# Supplementary material for: Omega-3-Supplemented Fat Diet Drives Immune Metabolic Response in Visceral Adipose Tissue by Modulating Gut Microbiota in a Mouse Model of Obesity
Source: MDPI journal article supplement (doi:10.3390/nu15061404), 2023-03-15
Supplement: s1 [file s1]

## Supplementary Materials

**Supplementary Table S1A: Alpha Diversity Index by Time**

| Supplementary Table S1A: Alpha Diversity Index by Time |         |        |        |        |        |        |         |
|--------------------------------------------------------|---------|--------|--------|--------|--------|--------|---------|
|                                                        | Week 0  |        |        |        |        |        |         |
|                                                        | DIET 1  |        |        | DIET 2 |        |        | p-value |
|                                                        | Median  | Min    | Max    | Median | Min    | Max    |         |
|                                                        |         |        |        |        |        |        |         |
| Observed ASVs                                          | 931     | 477    | 1043   | 944.5  | 883    | 998    | 0.5737  |
| Shannon Index                                          | 5.2910  | 4.6935 | 5.6325 | 5.4378 | 5.2185 | 5.7197 | 0.1605  |
| Simpson Index                                          | 0.9855  | 0.9819 | 0.9915 | 0.9864 | 0.9827 | 0.9934 | 0.1949  |
|                                                        | Week 4  |        |        |        |        |        |         |
|                                                        | DIET 1  |        |        | DIET 2 |        |        | p-value |
|                                                        | Median  | Min    | Max    | Median | Min    | Max    |         |
|                                                        |         |        |        |        |        |        |         |
| Observed ASVs                                          | 947     | 840    | 1042   | 1116.5 | 1075   | 1173   | 0.0002  |
| Shannon Index                                          | 5.3287  | 4.7586 | 5.5727 | 5.8203 | 5.6461 | 5.9144 | 0.0002  |
| Simpson Index                                          | 0.9858  | 0.9538 | 0.9893 | 0.9932 | 0.9907 | 0.9942 | 0.0002  |
|                                                        | Week 12 |        |        |        |        |        |         |
|                                                        | DIET 1  |        |        | DIET 2 |        |        | p-value |
|                                                        | Median  | Min    | Max    | Median | Min    | Max    |         |
|                                                        |         |        |        |        |        |        |         |
| Observed ASVs                                          | 1035    | 958    | 1104   | 1107   | 1014   | 1157   | 0.0207  |
| Shannon Index                                          | 5.4457  | 5.3138 | 5.6586 | 5.8946 | 5.7021 | 5.9963 | 0.0002  |
| Simpson Index                                          | 0.9869  | 0.9826 | 0.9914 | 0.9940 | 0.9915 | 0.9947 | 0.0002  |
|                                                        | Week 24 |        |        |        |        |        |         |
|                                                        | DIET 1  |        |        | DIET 2 |        |        | p-value |
|                                                        | Median  | Min    | Max    | Median | Min    | Max    |         |
|                                                        |         |        |        |        |        |        |         |
| Observed ASVs                                          | 995     | 859    | 1133   | 1080   | 1044   | 1177   | 0.0148  |
| Shannon Index                                          | 5.5636  | 5.3234 | 6.0780 | 5.7755 | 5.6106 | 6.0150 | 0.0830  |
| Simpson Index                                          | 0.9904  | 0.9866 | 0.9954 | 0.9927 | 0.9910 | 0.9948 | 0.0499  |

*Supplementary Table S1A:* Alpha diversity index (Observed ASVs, Shannon and Simpson Index) for groups D1 and D2 at different time feeding. Significant differences established using the Wilcoxon signed-rank test ( $p < 0.05$ ). p-values in bold style were statistically significant.

**Supplementary Table S1B: Alpha Diversity Index by Diets**

*Supplementary Table S1B: Alpha Diversity Index by Diets*

|                               | DIET1   |               |         |         | DIET2  |               |         |         |
|-------------------------------|---------|---------------|---------|---------|--------|---------------|---------|---------|
|                               | Week 0  | Week 4        | Week 12 | Week 24 | Week 0 | Week 4        | Week 12 | Week 24 |
| <i>Observed ASVs - Median</i> | 931     | 947           | 1035    | 995     | 945    | 1117          | 1107    | 1080    |
| <i>Observed ASVs - Min</i>    | 477     | 840           | 958     | 859     | 883    | 1075          | 1014    | 1044    |
| <i>Observed ASVs - Max</i>    | 1043    | 1042          | 1104    | 1133    | 998    | 1173          | 1157    | 1177    |
| <i>p - value</i>              |         | 0.1357        |         |         |        | <b>0.0024</b> |         |         |
| <i>Shannon Index - Median</i> | 5.2910  | 5.3287        | 5.4457  | 5.5636  | 5.4378 | 5.8203        | 5.8946  | 5.7755  |
| <i>Shannon Index - Min</i>    | 4.6935  | 4.7586        | 5.3138  | 5.3234  | 5.2185 | 5.6461        | 5.7021  | 5.6106  |
| <i>Shannon Index - Max</i>    | 5.6325  | 5.5727        | 5.6586  | 6.0780  | 5.7197 | 5.9144        | 5.9963  | 6.0150  |
| <i>p - value</i>              |         | <b>0.0336</b> |         |         |        | <b>0.0022</b> |         |         |
| <i>Simpson Index - Median</i> | 0.9855  | 0.9858        | 0.9869  | 0.9904  | 0.9864 | 0.9932        | 0.994   | 0.9927  |
| <i>Simpson Index - Min</i>    | 0.98194 | 0.95383       | 0.98265 | 0.98658 | 0.9827 | 0.9907        | 0.9915  | 0.9910  |
| <i>Simpson Index - Max</i>    | 0.99152 | 0.98933       | 0.99141 | 0.99537 | 0.9934 | 0.9942        | 0.9947  | 0.9948  |
| <i>p - value</i>              |         | <b>0.05</b>   |         |         |        | <b>0.0239</b> |         |         |

*Supplementary Table S1B:* Alpha diversity index (Observed ASVs, Shannon and Simpson Index) for week 0, 4, 12 and 24 in the different diets. Significant differences established using the Friedman test ( $p < 0.05$ ). p-values in bold style were statistically significant.

**Supplementary Table S1C: Post hoc analysis for significant Friedman test**

**Supplementary Table S1C: Post hoc analysis for significant Friedman test**

| Comparison        | DIET 1                          |                           |                           | DIET 2                          |                           |                           |
|-------------------|---------------------------------|---------------------------|---------------------------|---------------------------------|---------------------------|---------------------------|
|                   | Observed<br>ASVs<br>p-value adj | Shannon<br>p-value<br>adj | Simpson<br>p-value<br>adj | Observed<br>ASVs<br>p-value adj | Shannon<br>p-value<br>adj | Simpson<br>p-value<br>adj |
| Week 0 - Week 4   | -                               | 1.000                     | 1.000                     | <b>0.047</b>                    | 0.094                     | 0.328                     |
| Week 0 - Week 12  | -                               | 0.888                     | 1.000                     | <b>0.047</b>                    | <b>0.047</b>              | <b>0.047</b>              |
| Week 0 - Week 24  | -                               | 0.654                     | 0.328                     | <b>0.047</b>                    | <b>0.047</b>              | 0.654                     |
| Week 4 - Week 12  | -                               | 0.328                     | 1.000                     | 1.000                           | 1.000                     | 1.000                     |
| Week 4 - Week 24  | -                               | <b>0.047</b>              | <b>0.047</b>              | 1.000                           | 1.000                     | 1.000                     |
| Week 12 - Week 24 | -                               | 1.000                     | 0.328                     | 1.000                           | 0.328                     | 0.888                     |

**Supplementary Table S1C:** Post hoc analysis for Alpha diversity index (Observed ASVs, Shannon and Simpson Index) with significant Friedman test for week 0, 4, 12 and 24 in the different diets. Significant differences established using the Wilcoxon signed-rank test ( $p < 0.05$ ). p-values in bold style were statistically significant.

**Supplementary Table S2: Relative abundance comparison at Phylum level**

**Supplementary Table 2: Relative abundance comparison at Phylum level**

|                          | Week 0  |        |        |        |        |        |                |
|--------------------------|---------|--------|--------|--------|--------|--------|----------------|
|                          | DIET1   |        |        | DIET2  |        |        | <i>p-value</i> |
|                          | Median  | Min    | Max    | Median | Min    | Max    |                |
| <i>Actinobacteriota</i>  | 0.0002  | 0.0000 | 0.0008 | 0.0000 | 0.0000 | 0.0001 | 0.0716         |
| <i>Bacteroidota</i>      | 0.6699  | 0.5166 | 0.7285 | 0.6095 | 0.2582 | 0.7542 | 0.4948         |
| <i>Campylobacterota</i>  | 0.0116  | 0.0039 | 0.0225 | 0.0234 | 0.0044 | 0.0380 | 0.1893         |
| <i>Cyanobacteria</i>     | 0.0000  | 0.0000 | 0.0016 | 0.0001 | 0.0000 | 0.0007 | 0.8663         |
| <i>Deferribacterota</i>  | 0.0025  | 0.0007 | 0.0089 | 0.0033 | 0.0008 | 0.0137 | 0.4942         |
| <i>Desulfobacterota</i>  | 0.0058  | 0.0035 | 0.0131 | 0.0085 | 0.0047 | 0.0205 | 0.1715         |
| <i>Firmicutes</i>        | 0.2196  | 0.1187 | 0.3808 | 0.2954 | 0.1348 | 0.6280 | 0.3720         |
| <i>Patescibacteria</i>   | 0.0048  | 0.0001 | 0.0103 | 0.0061 | 0.0025 | 0.0128 | 0.4005         |
| <i>Proteobacteria</i>    | 0.0831  | 0.0619 | 0.1505 | 0.0609 | 0.0417 | 0.0921 | 0.1893         |
| <i>Verrucomicrobiota</i> | 0.0000  | 0.0000 | 0.0009 | 0.0000 | 0.0000 | 0.0000 | 0.3816         |
|                          | Week 4  |        |        |        |        |        |                |
|                          | DIET1   |        |        | DIET2  |        |        | <i>p-value</i> |
|                          | Median  | Min    | Max    | Median | Min    | Max    |                |
| <i>Actinobacteriota</i>  | 0.0001  | 0.0000 | 0.0007 | 0.0001 | 0.0000 | 0.0002 | 0.3575         |
| <i>Bacteroidota</i>      | 0.6721  | 0.6152 | 0.7727 | 0.5529 | 0.4621 | 0.6716 | <b>0.0074</b>  |
| <i>Campylobacterota</i>  | 0.0129  | 0.0073 | 0.0270 | 0.0272 | 0.0107 | 0.0406 | <b>0.0156</b>  |
| <i>Cyanobacteria</i>     | 0.0000  | 0.0000 | 0.0002 | 0.0003 | 0.0001 | 0.0008 | <b>0.0099</b>  |
| <i>Deferribacterota</i>  | 0.0022  | 0.0001 | 0.0041 | 0.0127 | 0.0047 | 0.0222 | <b>0.0009</b>  |
| <i>Desulfobacterota</i>  | 0.0059  | 0.0020 | 0.0075 | 0.0207 | 0.0143 | 0.0353 | <b>0.0009</b>  |
| <i>Firmicutes</i>        | 0.2002  | 0.1173 | 0.2568 | 0.2924 | 0.2090 | 0.3813 | <b>0.0054</b>  |
| <i>Patescibacteria</i>   | 0.0126  | 0.0101 | 0.0241 | 0.0218 | 0.0072 | 0.0399 | 0.0831         |
| <i>Proteobacteria</i>    | 0.0832  | 0.0718 | 0.1027 | 0.0617 | 0.0470 | 0.0735 | <b>0.0019</b>  |
| <i>Verrucomicrobiota</i> | 0.0000  | 0.0000 | 0.0012 | 0.0001 | 0.0000 | 0.0006 | 0.2304         |
|                          | Week 12 |        |        |        |        |        |                |
|                          | DIET1   |        |        | DIET2  |        |        | <i>p-value</i> |
|                          | Median  | Min    | Max    | Median | Min    | Max    |                |
| <i>Actinobacteriota</i>  | 0.0001  | 0.0000 | 0.0005 | 0.0000 | 0.0000 | 0.0001 | <b>0.0043</b>  |
| <i>Bacteroidota</i>      | 0.6603  | 0.6124 | 0.7147 | 0.5376 | 0.4350 | 0.6003 | <b>0.0009</b>  |
| <i>Campylobacterota</i>  | 0.0124  | 0.0050 | 0.0159 | 0.0179 | 0.0086 | 0.0352 | 0.0831         |
| <i>Cyanobacteria</i>     | 0.0001  | 0.0000 | 0.0007 | 0.0002 | 0.0000 | 0.0012 | 0.3071         |
| <i>Deferribacterota</i>  | 0.0015  | 0.0004 | 0.0047 | 0.0092 | 0.0033 | 0.0115 | <b>0.0019</b>  |
| <i>Desulfobacterota</i>  | 0.0058  | 0.0023 | 0.0110 | 0.0332 | 0.0214 | 0.0412 | <b>0.0009</b>  |
| <i>Firmicutes</i>        | 0.2157  | 0.1551 | 0.2395 | 0.3238 | 0.2568 | 0.4184 | <b>0.0009</b>  |
| <i>Patescibacteria</i>   | 0.0129  | 0.0119 | 0.0239 | 0.0146 | 0.0011 | 0.0185 | 0.8748         |
| <i>Proteobacteria</i>    | 0.0967  | 0.0508 | 0.1428 | 0.0612 | 0.0520 | 0.0808 | <b>0.0181</b>  |
| <i>Verrucomicrobiota</i> | 0.0002  | 0.0000 | 0.0011 | 0.0000 | 0.0000 | 0.0002 | 0.0823         |
|                          | Week 24 |        |        |        |        |        |                |
|                          | DIET1   |        |        | DIET2  |        |        | <i>p-value</i> |
|                          | Median  | Min    | Max    | Median | Min    | Max    |                |

---

|                          |        |        |        |        |        |        |               |
|--------------------------|--------|--------|--------|--------|--------|--------|---------------|
| <i>Actinobacteriota</i>  | 0.0002 | 0.0000 | 0.0004 | 0.0000 | 0.0000 | 0.0002 | 0.1524        |
| <i>Bacteroidota</i>      | 0.6711 | 0.4880 | 0.7742 | 0.5430 | 0.4993 | 0.6844 | 0.2271        |
| <i>Campylobacterota</i>  | 0.0159 | 0.0069 | 0.0256 | 0.0107 | 0.0020 | 0.0218 | 0.1893        |
| <i>Cyanobacteria</i>     | 0.0005 | 0.0000 | 0.0010 | 0.0001 | 0.0000 | 0.0002 | <b>0.0127</b> |
| <i>Deferribacterota</i>  | 0.0019 | 0.0002 | 0.0050 | 0.0045 | 0.0001 | 0.0082 | 0.2701        |
| <i>Desulfobacterota</i>  | 0.0054 | 0.0010 | 0.0139 | 0.0163 | 0.0083 | 0.0311 | <b>0.0039</b> |
| <i>Firmicutes</i>        | 0.1966 | 0.1298 | 0.4149 | 0.3025 | 0.2042 | 0.3722 | 0.1563        |
| <i>Patescibacteria</i>   | 0.0149 | 0.0061 | 0.0200 | 0.0235 | 0.0159 | 0.0688 | <b>0.0100</b> |
| <i>Proteobacteria</i>    | 0.0696 | 0.0413 | 0.1085 | 0.0763 | 0.0617 | 0.0879 | 0.5635        |
| <i>Verrucomicrobiota</i> | 0.0003 | 0.0000 | 0.0021 | 0.0000 | 0.0000 | 0.0010 | 0.3253        |

**Supplementary Table S2:** Relative abundance comparison between diet groups at Phylum level in the different weeks of study. Significant differences established using the Wilcoxon signed-rank test ( $p < 0.05$ ). p-values in bold style were statistically significant.

**Supplementary Table S3: Relative abundance comparison at Genus level**

**Supplementary Table S3: Relative abundance comparison at Genus level**

|                                       | Week 0 |        |        |        |        |        |               |
|---------------------------------------|--------|--------|--------|--------|--------|--------|---------------|
|                                       | DIET1  |        |        | DIET2  |        |        | p-value       |
|                                       | Median | Min    | Max    | Median | Min    | Max    |               |
| <i>Alloprevotella</i>                 | 0.1255 | 0.0311 | 0.1729 | 0.1140 | 0.0069 | 0.1544 | 0.4948        |
| <i>Lachnoanaerobaculum</i>            | 0.0185 | 0.0001 | 0.0636 | 0.0209 | 0.0114 | 0.0478 | 0.7929        |
| <i>Helicobacter</i>                   | 0.0243 | 0.0111 | 0.0609 | 0.0441 | 0.0150 | 0.0660 | 0.1278        |
| <i>Rikenellaceae RC9 gut group</i>    | 0.0205 | 0.0090 | 0.0486 | 0.0333 | 0.0061 | 0.0649 | 0.6365        |
| <i>Candidatus Saccharimonas</i>       | 0.0130 | 0.0001 | 0.0271 | 0.0121 | 0.0084 | 0.0381 | 0.7132        |
| <i>Bacteroides</i>                    | 0.1537 | 0.0947 | 0.5134 | 0.1527 | 0.0790 | 0.2466 | 1.0000        |
| <i>Prevotellaceae UCG-001</i>         | 0.0759 | 0.0030 | 0.1472 | 0.0748 | 0.0251 | 0.1799 | 0.7132        |
| <i>Flavonifractor</i>                 | 0.0079 | 0.0008 | 0.0120 | 0.0082 | 0.0055 | 0.0124 | 0.8748        |
| <i>Colidextribacter</i>               | 0.0221 | 0.0034 | 0.0376 | 0.0253 | 0.0140 | 0.0320 | 0.7132        |
| <i>Parasutterella</i>                 | 0.0271 | 0.0088 | 0.0787 | 0.0133 | 0.0005 | 0.0443 | 0.0520        |
| <i>Odoribacter</i>                    | 0.0193 | 0.0000 | 0.0658 | 0.0290 | 0.0181 | 0.0690 | 0.1893        |
| <i>Lachnospiraceae NK4A136 group</i>  | 0.1739 | 0.0040 | 0.3049 | 0.1499 | 0.1063 | 0.3421 | 0.9581        |
| <i>Intestinimonas</i>                 | 0.0108 | 0.0008 | 0.0169 | 0.0107 | 0.0077 | 0.0147 | 1.0000        |
| <i>Mucispirillum</i>                  | 0.0090 | 0.0020 | 0.0168 | 0.0084 | 0.0027 | 0.0215 | 0.9581        |
| <i>Oscillospira</i>                   | 0.0031 | 0.0001 | 0.0067 | 0.0025 | 0.0017 | 0.0038 | 0.5635        |
| <i>Muribaculum</i>                    | 0.0285 | 0.0079 | 0.0914 | 0.0262 | 0.0004 | 0.0680 | 0.7132        |
| <i>Herbinix</i>                       | 0.0129 | 0.0008 | 0.0400 | 0.0125 | 0.0073 | 0.0460 | 0.3184        |
| <i>Negativibacillus</i>               | 0.0052 | 0.0017 | 0.0089 | 0.0055 | 0.0018 | 0.0104 | 0.7132        |
| <i>Parabacteroides</i>                | 0.0238 | 0.0040 | 0.0407 | 0.0120 | 0.0001 | 0.0195 | 0.0831        |
| <i>Alistipes</i>                      | 0.0207 | 0.0029 | 0.0497 | 0.0186 | 0.0137 | 0.1007 | 0.7132        |
| <i>Ruminococcus gnavus group</i>      | 0.0048 | 0.0005 | 0.0067 | 0.0052 | 0.0018 | 0.0121 | 0.4309        |
| <i>Oscillibacter</i>                  | 0.0069 | 0.0002 | 0.0107 | 0.0090 | 0.0040 | 0.0186 | 0.0831        |
| <i>Ligilactobacillus</i>              | 0.0046 | 0.0017 | 0.0224 | 0.0055 | 0.0007 | 0.0109 | 0.7929        |
| <i>Anaerotruncus</i>                  | 0.0008 | 0.0000 | 0.0060 | 0.0010 | 0.0000 | 0.0085 | 0.8335        |
| <i>Eubacterium xylanophilum group</i> | 0.0040 | 0.0001 | 0.0138 | 0.0038 | 0.0020 | 0.0100 | 0.8748        |
| <i>Prevotella 7</i>                   | 0.0014 | 0.0002 | 0.0045 | 0.0007 | 0.0002 | 0.0038 | 0.7132        |
| <i>Harryflintia</i>                   | 0.0016 | 0.0001 | 0.0034 | 0.0027 | 0.0006 | 0.0044 | 0.1563        |
| <i>Desulfovibrio</i>                  | 0.0023 | 0.0002 | 0.0039 | 0.0031 | 0.0011 | 0.0036 | 0.4948        |
| <i>Tuzzerella</i>                     | 0.0031 | 0.0000 | 0.0060 | 0.0041 | 0.0008 | 0.0061 | 0.4309        |
| <i>Anaeroplasma</i>                   | 0.0028 | 0.0000 | 0.0128 | 0.0046 | 0.0016 | 0.0208 | 0.0831        |
| <i>Butyricicoccaceae UCG-009</i>      | 0.0020 | 0.0000 | 0.0063 | 0.0030 | 0.0005 | 0.0036 | 0.3184        |
| <i>Erysipelatoclostridium</i>         | 0.0009 | 0.0003 | 0.1317 | 0.0002 | 0.0000 | 0.0027 | 0.0831        |
| <i>Ruminococcaceae UCG-001</i>        | 0.0004 | 0.0000 | 0.0043 | 0.0000 | 0.0000 | 0.0014 | 0.2620        |
| <i>Lachnoclostridium</i>              | 0.0064 | 0.0021 | 0.0111 | 0.0095 | 0.0050 | 0.0238 | 0.1893        |
| <i>Ruminococcaceae Incertae Sedis</i> | 0.0024 | 0.0006 | 0.0051 | 0.0033 | 0.0014 | 0.0054 | 0.3184        |
| <i>Butyricicoccus</i>                 | 0.0021 | 0.0002 | 0.0078 | 0.0016 | 0.0000 | 0.0028 | 0.4309        |
| <i>Stomatobaculum</i>                 | 0.0002 | 0.0000 | 0.0053 | 0.0003 | 0.0000 | 0.0006 | 0.9575        |
| <i>Prevotellaceae NK3B31 group</i>    | 0.0000 | 0.0000 | 0.0029 | 0.0000 | 0.0000 | 0.0004 | 1.0000        |
| <i>Lactobacillus</i>                  | 0.0005 | 0.0000 | 0.0163 | 0.0001 | 0.0000 | 0.0010 | 0.1179        |
| <i>Eubacterium eligens group</i>      | 0.0002 | 0.0000 | 0.0019 | 0.0019 | 0.0004 | 0.0060 | <b>0.0136</b> |
| <i>Lachnospiraceae GCA-900066575</i>  | 0.0109 | 0.0018 | 0.0229 | 0.0065 | 0.0015 | 0.0189 | 0.4309        |
| <i>Rikenella</i>                      | 0.0032 | 0.0000 | 0.0142 | 0.0042 | 0.0008 | 0.0152 | 0.6365        |

|                                                  |        |        |        |        |        |        |               |
|--------------------------------------------------|--------|--------|--------|--------|--------|--------|---------------|
| <i>Ruminococcus</i>                              | 0.0005 | 0.0000 | 0.0058 | 0.0000 | 0.0000 | 0.0032 | 0.2976        |
| <i>Acetatifactor</i>                             | 0.0032 | 0.0000 | 0.0144 | 0.0065 | 0.0008 | 0.0152 | 0.5635        |
| <i>Lactobacillaceae HT002</i>                    | 0.0000 | 0.0000 | 0.0084 | 0.0000 | 0.0000 | 0.0002 | 0.8360        |
| <i>Angelakisella</i>                             | 0.0007 | 0.0001 | 0.0022 | 0.0006 | 0.0002 | 0.0013 | 0.7132        |
| <i>Lachnospiraceae ASF356</i>                    | 0.0038 | 0.0009 | 0.0202 | 0.0051 | 0.0000 | 0.0108 | 0.8748        |
| <i>Lachnospiraceae UCG-006</i>                   | 0.0029 | 0.0004 | 0.0041 | 0.0016 | 0.0009 | 0.0087 | 0.9581        |
| <i>Oscillospiraceae UCG-003</i>                  | 0.0005 | 0.0000 | 0.0016 | 0.0004 | 0.0000 | 0.0020 | 0.8745        |
| <i>Eubacterium siraeum group</i>                 | 0.0011 | 0.0000 | 0.0220 | 0.0027 | 0.0005 | 0.0096 | 0.5635        |
| <i>Ruminococcaceae UBA1819</i>                   | 0.0000 | 0.0000 | 0.0003 | 0.0000 | 0.0000 | 0.0000 | 0.1709        |
| <i>Dubosiella</i>                                | 0.0009 | 0.0000 | 0.0166 | 0.0003 | 0.0000 | 0.0015 | 0.2445        |
| <i>Paludicola</i>                                | 0.0013 | 0.0000 | 0.0024 | 0.0006 | 0.0001 | 0.0016 | 0.0661        |
| <i>Lachnospiraceae FCS020 group</i>              | 0.0008 | 0.0001 | 0.0026 | 0.0015 | 0.0004 | 0.0117 | 0.1893        |
| <i>Anaerosporebacter</i>                         | 0.0007 | 0.0000 | 0.0055 | 0.0000 | 0.0000 | 0.0012 | 0.1389        |
| <i>Bilophila</i>                                 | 0.0002 | 0.0000 | 0.0007 | 0.0004 | 0.0000 | 0.0007 | 0.3973        |
| <i>Lachnospiraceae UCG-001</i>                   | 0.0008 | 0.0000 | 0.0046 | 0.0007 | 0.0002 | 0.0080 | 0.7130        |
| <i>Escherichia-Shigella</i>                      | 0.0008 | 0.0004 | 0.0057 | 0.0000 | 0.0000 | 0.0002 | 0.0007        |
| <i>Oscillospiraceae UCG-002</i>                  | 0.0002 | 0.0000 | 0.0005 | 0.0004 | 0.0000 | 0.0009 | 0.1550        |
| <i>Shuttleworthia</i>                            | 0.0007 | 0.0000 | 0.0043 | 0.0017 | 0.0000 | 0.0041 | 0.7923        |
| <i>Eubacterium nodatum group</i>                 | 0.0017 | 0.0002 | 0.0044 | 0.0023 | 0.0010 | 0.0032 | 0.5635        |
| <i>Oscillospiraceae V9D2013 group</i>            | 0.0003 | 0.0000 | 0.0009 | 0.0004 | 0.0000 | 0.0008 | 0.8335        |
| <i>Oscillospiraceae NK4A214 group</i>            | 0.0004 | 0.0000 | 0.0007 | 0.0003 | 0.0000 | 0.0010 | 1.0000        |
| <i>Anaerovorax</i>                               | 0.0000 | 0.0000 | 0.0007 | 0.0000 | 0.0000 | 0.0007 | 1.0000        |
| <i>Roseburia</i>                                 | 0.0017 | 0.0002 | 0.0070 | 0.0027 | 0.0008 | 0.0092 | 0.2271        |
| <i>Lachnospiraceae UCG-003</i>                   | 0.0000 | 0.0000 | 0.0024 | 0.0001 | 0.0000 | 0.0068 | 0.5009        |
| <i>Ureaplasma</i>                                | 0.0005 | 0.0000 | 0.0053 | 0.0015 | 0.0000 | 0.0112 | 0.3649        |
| <i>Faecalibaculum</i>                            | 0.0000 | 0.0000 | 0.0089 | 0.0000 | 0.0000 | 0.0000 | 0.0764        |
| <i>Christensenellaceae R-7 group</i>             | 0.0004 | 0.0000 | 0.0020 | 0.0002 | 0.0000 | 0.0008 | 0.3973        |
| <i>Anaerostipes</i>                              | 0.0001 | 0.0000 | 0.0004 | 0.0001 | 0.0000 | 0.0005 | 0.4761        |
| <i>Mobilitalea</i>                               | 0.0005 | 0.0001 | 0.0022 | 0.0006 | 0.0003 | 0.0014 | 0.5635        |
| <i>Lachnospiraceae A2</i>                        | 0.0005 | 0.0003 | 0.0016 | 0.0013 | 0.0002 | 0.0052 | 0.1278        |
| <i>Akkermansia</i>                               | 0.0000 | 0.0000 | 0.0036 | 0.0000 | 0.0000 | 0.0000 | 0.3816        |
| <i>Peptococcus</i>                               | 0.0008 | 0.0000 | 0.0021 | 0.0011 | 0.0007 | 0.0018 | 0.5635        |
| <i>Eubacterium fissicatena group</i>             | 0.0005 | 0.0000 | 0.0016 | 0.0007 | 0.0000 | 0.0014 | 1.0000        |
| <i>Tyzzereella</i>                               | 0.0004 | 0.0000 | 0.0033 | 0.0000 | 0.0000 | 0.0007 | 0.1480        |
| <i>Lachnospiraceae UCG-009</i>                   | 0.0003 | 0.0000 | 0.0031 | 0.0001 | 0.0000 | 0.0011 | 0.3514        |
| <i>Monoglobus</i>                                | 0.0004 | 0.0000 | 0.0022 | 0.0001 | 0.0000 | 0.0005 | 0.2497        |
| <i>Anaerovoracaceae Family XIII UCG-001</i>      | 0.0002 | 0.0000 | 0.0006 | 0.0001 | 0.0000 | 0.0005 | 0.5465        |
| <i>Marvinbryantia</i>                            | 0.0003 | 0.0000 | 0.0018 | 0.0001 | 0.0000 | 0.0005 | 0.2202        |
| <i>Salmonella</i>                                | 0.0000 | 0.0000 | 0.0020 | 0.0000 | 0.0000 | 0.0001 | 0.2697        |
| <i>Lactococcus</i>                               | 0.0008 | 0.0000 | 0.0041 | 0.0001 | 0.0000 | 0.0006 | 0.0569        |
| <i>Anaerovoracaceae Family XIII AD3011 group</i> | 0.0001 | 0.0000 | 0.0012 | 0.0001 | 0.0000 | 0.0009 | 0.9553        |
| <i>Lachnospiraceae UCG-004</i>                   | 0.0003 | 0.0000 | 0.0009 | 0.0003 | 0.0000 | 0.0011 | 0.7509        |
| <i>Veillonella</i>                               | 0.0002 | 0.0000 | 0.0004 | 0.0000 | 0.0000 | 0.0004 | 0.1480        |
| <i>Merdibacter</i>                               | 0.0000 | 0.0000 | 0.0003 | 0.0000 | 0.0000 | 0.0002 | 0.3342        |
| <i>Lachnospiraceae UC5-1-2E3</i>                 | 0.0000 | 0.0000 | 0.0003 | 0.0002 | 0.0000 | 0.0006 | <b>0.0380</b> |
| <i>Olsenella</i>                                 | 0.0003 | 0.0000 | 0.0007 | 0.0000 | 0.0000 | 0.0001 | <b>0.0298</b> |

|                                       |               |            |            |               |            |            |                |
|---------------------------------------|---------------|------------|------------|---------------|------------|------------|----------------|
| <i>Mycoplasma</i>                     | 0.0000        | 0.0000     | 0.0027     | 0.0004        | 0.0000     | 0.0027     | <b>0.0249</b>  |
| <i>Lachnospiraceae AC2044 group</i>   | 0.0000        | 0.0000     | 0.0013     | 0.0000        | 0.0000     | 0.0000     | 0.1709         |
| <i>Coriobacteriaceae UCG-002</i>      | 0.0001        | 0.0000     | 0.0008     | 0.0000        | 0.0000     | 0.0002     | 0.0847         |
| <b>Week 4</b>                         |               |            |            |               |            |            |                |
|                                       | <b>DIET1</b>  |            |            | <b>DIET2</b>  |            |            | <b>p-value</b> |
|                                       | <b>Median</b> | <b>Min</b> | <b>Max</b> | <b>Median</b> | <b>Min</b> | <b>Max</b> |                |
| <i>Alloprevotella</i>                 | 0.1146        | 0.0341     | 0.2013     | 0.0735        | 0.0258     | 0.1415     | 0.1036         |
| <i>Lachnoanaerobaculum</i>            | 0.0194        | 0.0080     | 0.0347     | 0.0311        | 0.0161     | 0.0393     | 0.1893         |
| <i>Helicobacter</i>                   | 0.0410        | 0.0253     | 0.0704     | 0.0790        | 0.0246     | 0.1059     | 0.0313         |
| <i>Rikenellaceae RC9 gut group</i>    | 0.0297        | 0.0090     | 0.0679     | 0.0302        | 0.0119     | 0.0442     | 0.7132         |
| <i>Candidatus Saccharimonas</i>       | 0.0421        | 0.0263     | 0.0833     | 0.0597        | 0.0264     | 0.0858     | 0.3720         |
| <i>Bacteroides</i>                    | 0.1040        | 0.0654     | 0.1211     | 0.0865        | 0.0508     | 0.1449     | 0.3184         |
| <i>Prevotellaceae UCG-001</i>         | 0.0910        | 0.0218     | 0.1158     | 0.0438        | 0.0140     | 0.0930     | 0.0406         |
| <i>Flavonifractor</i>                 | 0.0074        | 0.0038     | 0.0161     | 0.0169        | 0.0075     | 0.0342     | 0.0136         |
| <i>Colidextribacter</i>               | 0.0363        | 0.0229     | 0.0790     | 0.0396        | 0.0303     | 0.0553     | 0.7132         |
| <i>Parasutterella</i>                 | 0.0479        | 0.0208     | 0.1005     | 0.0318        | 0.0222     | 0.0475     | 0.1563         |
| <i>Odoribacter</i>                    | 0.0139        | 0.0049     | 0.0308     | 0.0178        | 0.0090     | 0.0302     | 0.4948         |
| <i>Lachnospiraceae NK4A136 group</i>  | 0.1649        | 0.0816     | 0.2491     | 0.1811        | 0.1119     | 0.1995     | 0.3720         |
| <i>Intestinimonas</i>                 | 0.0169        | 0.0068     | 0.0275     | 0.0167        | 0.0092     | 0.0234     | 0.9581         |
| <i>Mucispirillum</i>                  | 0.0062        | 0.0002     | 0.0144     | 0.0296        | 0.0107     | 0.0580     | 0.0028         |
| <i>Oscillospira</i>                   | 0.0028        | 0.0014     | 0.0089     | 0.0092        | 0.0051     | 0.0183     | 0.0074         |
| <i>Muribaculum</i>                    | 0.0476        | 0.0172     | 0.0951     | 0.0190        | 0.0117     | 0.0778     | 0.0181         |
| <i>Herbinix</i>                       | 0.0040        | 0.0022     | 0.0408     | 0.0062        | 0.0018     | 0.0217     | 0.7929         |
| <i>Negativibacillus</i>               | 0.0033        | 0.0015     | 0.0073     | 0.0109        | 0.0064     | 0.0138     | 0.0019         |
| <i>Parabacteroides</i>                | 0.0149        | 0.0063     | 0.0468     | 0.0195        | 0.0083     | 0.0365     | 0.7132         |
| <i>Alistipes</i>                      | 0.0092        | 0.0056     | 0.0216     | 0.0222        | 0.0070     | 0.0299     | 0.0313         |
| <i>Ruminococcus gnavus group</i>      | 0.0061        | 0.0036     | 0.0154     | 0.0034        | 0.0020     | 0.0062     | 0.0181         |
| <i>Oscillibacter</i>                  | 0.0040        | 0.0014     | 0.0089     | 0.0104        | 0.0080     | 0.0233     | 0.0019         |
| <i>Ligilactobacillus</i>              | 0.0068        | 0.0015     | 0.0158     | 0.0052        | 0.0022     | 0.0107     | 0.4309         |
| <i>Anaerotruncus</i>                  | 0.0004        | 0.0002     | 0.0011     | 0.0104        | 0.0061     | 0.0241     | 0.0009         |
| <i>Eubacterium xylanophilum group</i> | 0.0060        | 0.0022     | 0.0109     | 0.0049        | 0.0028     | 0.0090     | 0.8748         |
| <i>Prevotella 7</i>                   | 0.0010        | 0.0003     | 0.0033     | 0.0007        | 0.0002     | 0.0014     | 0.5635         |
| <i>Harryflintia</i>                   | 0.0011        | 0.0004     | 0.0025     | 0.0035        | 0.0019     | 0.0058     | 0.0039         |
| <i>Desulfovibrio</i>                  | 0.0145        | 0.0036     | 0.0211     | 0.0078        | 0.0046     | 0.0135     | 0.0313         |
| <i>Tuzzerella</i>                     | 0.0059        | 0.0038     | 0.0131     | 0.0082        | 0.0036     | 0.0142     | 0.2701         |
| <i>Anaeroplasma</i>                   | 0.0005        | 0.0004     | 0.0069     | 0.0008        | 0.0004     | 0.0038     | 0.7929         |
| <i>Butyricicoccaceae UCG-009</i>      | 0.0029        | 0.0022     | 0.0047     | 0.0039        | 0.0017     | 0.0088     | 0.3720         |
| <i>Erysipelatoclostridium</i>         | 0.0002        | 0.0000     | 0.0018     | 0.0002        | 0.0000     | 0.0010     | 0.9575         |
| <i>Ruminococcaceae UCG-001</i>        | 0.0016        | 0.0000     | 0.0127     | 0.0011        | 0.0000     | 0.0119     | 1.0000         |
| <i>Lachnoclostridium</i>              | 0.0059        | 0.0016     | 0.0117     | 0.0039        | 0.0023     | 0.0068     | 0.4948         |
| <i>Ruminococcaceae Incertae Sedis</i> | 0.0038        | 0.0023     | 0.0083     | 0.0063        | 0.0041     | 0.0081     | 0.1036         |
| <i>Butyricoccus</i>                   | 0.0037        | 0.0029     | 0.0074     | 0.0020        | 0.0011     | 0.0052     | <b>0.0181</b>  |
| <i>Stomatobaculum</i>                 | 0.0014        | 0.0000     | 0.0053     | 0.0019        | 0.0009     | 0.0080     | 0.4309         |
| <i>Prevotellaceae NK3B31 group</i>    | 0.0000        | 0.0000     | 0.0000     | 0.0003        | 0.0000     | 0.0188     | <b>0.0015</b>  |
| <i>Lactobacillus</i>                  | 0.0006        | 0.0002     | 0.0033     | 0.0017        | 0.0002     | 0.0197     | 0.2271         |



|                                                  |        |        |        |        |        |        |               |
|--------------------------------------------------|--------|--------|--------|--------|--------|--------|---------------|
| <i>Eubacterium eligens</i> group                 | 0.0003 | 0.0000 | 0.0028 | 0.0019 | 0.0007 | 0.0067 | <b>0.0180</b> |
| <i>Lachnospiraceae</i> GCA-900066575             | 0.0069 | 0.0036 | 0.0114 | 0.0025 | 0.0005 | 0.0036 | <b>0.0014</b> |
| <i>Rikenella</i>                                 | 0.0024 | 0.0007 | 0.0034 | 0.0027 | 0.0018 | 0.0051 | 0.2271        |
| <i>Ruminococcus</i>                              | 0.0017 | 0.0009 | 0.0059 | 0.0053 | 0.0020 | 0.0061 | <b>0.0313</b> |
| <i>Acetatifactor</i>                             | 0.0054 | 0.0006 | 0.0148 | 0.0052 | 0.0013 | 0.0353 | 0.9581        |
| <i>Lactobacillaceae</i> HT002                    | 0.0003 | 0.0000 | 0.0013 | 0.0008 | 0.0000 | 0.0038 | 0.2630        |
| <i>Angelakisella</i>                             | 0.0007 | 0.0002 | 0.0038 | 0.0013 | 0.0004 | 0.0022 | 0.3720        |
| <i>Lachnospiraceae</i> ASF356                    | 0.0009 | 0.0002 | 0.0192 | 0.0060 | 0.0031 | 0.0183 | <b>0.0181</b> |
| <i>Lachnospiraceae</i> UCG-006                   | 0.0041 | 0.0024 | 0.0141 | 0.0016 | 0.0011 | 0.0045 | <b>0.0313</b> |
| <i>Oscillospiraceae</i> UCG-003                  | 0.0008 | 0.0002 | 0.0019 | 0.0006 | 0.0003 | 0.0019 | 0.5635        |
| <i>Eubacterium siraeum</i> group                 | 0.0009 | 0.0000 | 0.0041 | 0.0083 | 0.0042 | 0.0098 | <b>0.0009</b> |
| <i>Ruminococcaceae</i> UBA1819                   | 0.0000 | 0.0000 | 0.0000 | 0.0007 | 0.0000 | 0.0049 | <b>0.0015</b> |
| <i>Dubosiella</i>                                | 0.0031 | 0.0006 | 0.0055 | 0.0008 | 0.0001 | 0.0070 | 0.1278        |
| <i>Paludicola</i>                                | 0.0014 | 0.0002 | 0.0046 | 0.0027 | 0.0017 | 0.0074 | <b>0.0313</b> |
| <i>Lachnospiraceae</i> FCS020 group              | 0.0003 | 0.0002 | 0.0019 | 0.0002 | 0.0000 | 0.0005 | 0.0822        |
| <i>Anaerosporebacter</i>                         | 0.0003 | 0.0000 | 0.0013 | 0.0002 | 0.0000 | 0.0013 | 0.8739        |
| <i>Bilophila</i>                                 | 0.0036 | 0.0006 | 0.0066 | 0.0013 | 0.0007 | 0.0022 | 0.0239        |
| <i>Lachnospiraceae</i> UCG-001                   | 0.0017 | 0.0005 | 0.0059 | 0.0015 | 0.0004 | 0.0076 | 0.7132        |
| <i>Escherichia-Shigella</i>                      | 0.0019 | 0.0011 | 0.0046 | 0.0031 | 0.0021 | 0.0048 | 0.1893        |
| <i>Oscillospiraceae</i> UCG-002                  | 0.0002 | 0.0000 | 0.0007 | 0.0007 | 0.0003 | 0.0013 | <b>0.0074</b> |
| <i>Shuttleworthia</i>                            | 0.0000 | 0.0000 | 0.0002 | 0.0012 | 0.0006 | 0.0029 | <b>0.0007</b> |
| <i>Eubacterium nodatum</i> group                 | 0.0017 | 0.0012 | 0.0023 | 0.0045 | 0.0019 | 0.0064 | <b>0.0019</b> |
| <i>Oscillospiraceae</i> V9D2013 group            | 0.0001 | 0.0000 | 0.0004 | 0.0010 | 0.0002 | 0.0016 | <b>0.0036</b> |
| <i>Oscillospiraceae</i> NK4A214 group            | 0.0008 | 0.0000 | 0.0014 | 0.0007 | 0.0005 | 0.0012 | 0.5635        |
| <i>Anaerovorax</i>                               | 0.0009 | 0.0002 | 0.0017 | 0.0000 | 0.0000 | 0.0012 | <b>0.0113</b> |
| <i>Roseburia</i>                                 | 0.0015 | 0.0002 | 0.0042 | 0.0050 | 0.0019 | 0.0106 | <b>0.0136</b> |
| <i>Lachnospiraceae</i> UCG-003                   | 0.0000 | 0.0000 | 0.0014 | 0.0002 | 0.0000 | 0.0008 | 0.2497        |
| <i>Ureaplasma</i>                                | 0.0000 | 0.0000 | 0.0000 | 0.0000 | 0.0000 | 0.0002 | 0.0764        |
| <i>Faecalibaculum</i>                            | 0.0004 | 0.0000 | 0.0066 | 0.0000 | 0.0000 | 0.0005 | 0.1448        |
| <i>Christensenellaceae</i> R-7 group             | 0.0010 | 0.0002 | 0.0023 | 0.0009 | 0.0003 | 0.0019 | 0.9581        |
| <i>Anaerostipes</i>                              | 0.0004 | 0.0000 | 0.0008 | 0.0004 | 0.0001 | 0.0009 | 0.8748        |
| <i>Mobilitalea</i>                               | 0.0005 | 0.0000 | 0.0012 | 0.0000 | 0.0000 | 0.0007 | <b>0.0136</b> |
| <i>Lachnospiraceae</i> A2                        | 0.0017 | 0.0004 | 0.0062 | 0.0008 | 0.0002 | 0.0015 | <b>0.0239</b> |
| <i>Akkermansia</i>                               | 0.0000 | 0.0000 | 0.0049 | 0.0002 | 0.0000 | 0.0017 | 0.3318        |
| <i>Peptococcus</i>                               | 0.0011 | 0.0005 | 0.0027 | 0.0029 | 0.0009 | 0.0046 | <b>0.0181</b> |
| <i>Eubacterium fissicatena</i> group             | 0.0010 | 0.0002 | 0.0036 | 0.0000 | 0.0000 | 0.0002 | <b>0.0008</b> |
| <i>Tyzzerella</i>                                | 0.0000 | 0.0000 | 0.0002 | 0.0014 | 0.0002 | 0.0046 | <b>0.0008</b> |
| <i>Lachnospiraceae</i> UCG-009                   | 0.0000 | 0.0000 | 0.0003 | 0.0001 | 0.0000 | 0.0017 | 0.5069        |
| <i>Monoglobus</i>                                | 0.0002 | 0.0000 | 0.0015 | 0.0008 | 0.0002 | 0.0013 | 0.1025        |
| <i>Anaerovoracaceae</i> Family XIII UCG-001      | 0.0007 | 0.0002 | 0.0015 | 0.0004 | 0.0002 | 0.0012 | 0.1893        |
| <i>Marvinbryantia</i>                            | 0.0003 | 0.0000 | 0.0028 | 0.0001 | 0.0000 | 0.0002 | 0.1957        |
| <i>Salmonella</i>                                | 0.0001 | 0.0000 | 0.0004 | 0.0000 | 0.0000 | 0.0007 | 0.8622        |
| <i>Lactococcus</i>                               | 0.0000 | 0.0000 | 0.0009 | 0.0000 | 0.0000 | 0.0000 | 0.0764        |
| <i>Anaerovoracaceae</i> Family XIII AD3011 group | 0.0011 | 0.0005 | 0.0028 | 0.0006 | 0.0000 | 0.0016 | <b>0.0406</b> |
| <i>Lachnospiraceae</i> UCG-004                   | 0.0004 | 0.0000 | 0.0005 | 0.0002 | 0.0000 | 0.0009 | 0.4240        |
| <i>Veillonella</i>                               | 0.0004 | 0.0002 | 0.0013 | 0.0000 | 0.0000 | 0.0000 | <b>0.0004</b> |

|                                       |               |            |            |               |            |            |                |
|---------------------------------------|---------------|------------|------------|---------------|------------|------------|----------------|
| <i>Merdibacter</i>                    | 0.0000        | 0.0000     | 0.0003     | 0.0001        | 0.0000     | 0.0004     | 0.4328         |
| <i>Lachnospiraceae UC5-1-2E3</i>      | 0.0002        | 0.0000     | 0.0006     | 0.0002        | 0.0000     | 0.0004     | 0.5968         |
| <i>Olsenella</i>                      | 0.0003        | 0.0000     | 0.0017     | 0.0000        | 0.0000     | 0.0005     | 0.1389         |
| <i>Mycoplasma</i>                     | 0.0000        | 0.0000     | 0.0000     | 0.0000        | 0.0000     | 0.0003     | 0.0764         |
| <i>Lachnospiraceae AC2044 group</i>   | 0.0000        | 0.0000     | 0.0000     | 0.0001        | 0.0000     | 0.0004     | <b>0.0325</b>  |
| <i>Coriobacteriaceae UCG-002</i>      | 0.0000        | 0.0000     | 0.0010     | 0.0000        | 0.0000     | 0.0003     | 0.5656         |
| <b>Week 12</b>                        |               |            |            |               |            |            |                |
|                                       | <b>DIET1</b>  |            |            | <b>DIET2</b>  |            |            | <b>p-value</b> |
|                                       | <b>Median</b> | <b>Min</b> | <b>Max</b> | <b>Median</b> | <b>Min</b> | <b>Max</b> |                |
| <i>Alloprevotella</i>                 | 0.0677        | 0.0351     | 0.2073     | 0.0382        | 0.0253     | 0.0781     | 0.0661         |
| <i>Lachnoanaerobaculum</i>            | 0.0174        | 0.0044     | 0.0261     | 0.0224        | 0.0078     | 0.0471     | 0.1563         |
| <i>Helicobacter</i>                   | 0.0377        | 0.0185     | 0.0488     | 0.0532        | 0.0155     | 0.0774     | 0.1563         |
| <i>Rikenellaceae RC9 gut group</i>    | 0.0218        | 0.0095     | 0.0346     | 0.0288        | 0.0098     | 0.0466     | 0.1036         |
| <i>Candidatus Saccharimonas</i>       | 0.0472        | 0.0288     | 0.0888     | 0.0335        | 0.0024     | 0.0627     | 0.052          |
| <i>Bacteroides</i>                    | 0.0739        | 0.0337     | 0.2251     | 0.0772        | 0.0505     | 0.2352     | 0.7132         |
| <i>Prevotellaceae UCG-001</i>         | 0.0467        | 0.0213     | 0.2070     | 0.0541        | 0.0254     | 0.1131     | 0.9581         |
| <i>Flavonifractor</i>                 | 0.0176        | 0.0092     | 0.0260     | 0.0223        | 0.0142     | 0.0265     | 0.1893         |
| <i>Colidextribacter</i>               | 0.0402        | 0.0323     | 0.0503     | 0.0485        | 0.0361     | 0.0650     | 0.0661         |
| <i>Parasutterella</i>                 | 0.1050        | 0.0196     | 0.1580     | 0.0380        | 0.0086     | 0.0571     | <b>0.0239</b>  |
| <i>Odoribacter</i>                    | 0.0173        | 0.0052     | 0.0624     | 0.0232        | 0.0132     | 0.0380     | 0.1278         |
| <i>Lachnospiraceae NK4A136 group</i>  | 0.1571        | 0.1080     | 0.1956     | 0.2291        | 0.1457     | 0.3176     | <b>0.0074</b>  |
| <i>Intestinimonas</i>                 | 0.0190        | 0.0110     | 0.0417     | 0.0197        | 0.0111     | 0.0297     | 0.7929         |
| <i>Mucispirillum</i>                  | 0.0052        | 0.0018     | 0.0118     | 0.0208        | 0.0112     | 0.0321     | <b>0.0014</b>  |
| <i>Oscillospira</i>                   | 0.0054        | 0.0025     | 0.0102     | 0.0076        | 0.0008     | 0.0147     | 0.0831         |
| <i>Muribaculum</i>                    | 0.0467        | 0.0210     | 0.0843     | 0.0232        | 0.0043     | 0.0441     | <b>0.0181</b>  |
| <i>Herbinix</i>                       | 0.0065        | 0.0019     | 0.0275     | 0.0067        | 0.0012     | 0.0170     | 0.7929         |
| <i>Negativibacillus</i>               | 0.0036        | 0.0009     | 0.0106     | 0.0108        | 0.0016     | 0.0161     | <b>0.0239</b>  |
| <i>Parabacteroides</i>                | 0.0122        | 0.0026     | 0.0467     | 0.0102        | 0.0053     | 0.0393     | 0.4309         |
| <i>Alistipes</i>                      | 0.0142        | 0.0068     | 0.0459     | 0.0149        | 0.0063     | 0.0574     | 0.6365         |
| <i>Ruminococcus gnavus group</i>      | 0.0021        | 0.0009     | 0.0050     | 0.0024        | 0.0009     | 0.0040     | 1.0000         |
| <i>Oscillibacter</i>                  | 0.0071        | 0.0021     | 0.0106     | 0.0124        | 0.0040     | 0.0170     | <b>0.0181</b>  |
| <i>Ligilactobacillus</i>              | 0.0204        | 0.0025     | 0.0358     | 0.0028        | 0.0004     | 0.0041     | <b>0.0039</b>  |
| <i>Anaerotruncus</i>                  | 0.0000        | 0.0000     | 0.0007     | 0.0071        | 0.0008     | 0.0228     | <b>0.0008</b>  |
| <i>Eubacterium xylanophilum group</i> | 0.0082        | 0.0042     | 0.0196     | 0.0063        | 0.0021     | 0.0133     | 0.2271         |
| <i>Prevotella 7</i>                   | 0.0008        | 0.0000     | 0.0047     | 0.0011        | 0.0000     | 0.0029     | 0.5624         |
| <i>Harryflintia</i>                   | 0.0015        | 0.0005     | 0.0040     | 0.0037        | 0.0012     | 0.0057     | <b>0.0136</b>  |
| <i>Desulfovibrio</i>                  | 0.0088        | 0.0048     | 0.0351     | 0.0136        | 0.0061     | 0.0285     | 0.372          |
| <i>Tuzzerella</i>                     | 0.0044        | 0.0030     | 0.0091     | 0.0142        | 0.0065     | 0.0210     | <b>0.0054</b>  |
| <i>Anaeroplasma</i>                   | 0.0028        | 0.0013     | 0.0046     | 0.0016        | 0.0008     | 0.0026     | 0.0831         |
| <i>Butyricocccaceae UCG-009</i>       | 0.0028        | 0.0013     | 0.0062     | 0.0021        | 0.0011     | 0.0132     | 0.7929         |
| <i>Erysipelatoclostridium</i>         | 0.0000        | 0.0000     | 0.0011     | 0.0000        | 0.0000     | 0.0002     | 0.4066         |
| <i>Ruminococcaceae UCG-001</i>        | 0.0002        | 0.0000     | 0.0046     | 0.0003        | 0.0000     | 0.0037     | 0.9575         |
| <i>Lachnoclostridium</i>              | 0.0050        | 0.0023     | 0.0083     | 0.0055        | 0.0012     | 0.0129     | 0.8748         |
| <i>Ruminococcaceae Incertae Sedis</i> | 0.0024        | 0.0013     | 0.0064     | 0.0032        | 0.0018     | 0.0048     | 0.4309         |
| <i>Butyricoccus</i>                   | 0.0032        | 0.0019     | 0.0095     | 0.0021        | 0.0012     | 0.0037     | <b>0.0313</b>  |

|                                             |        |        |        |        |        |        |               |
|---------------------------------------------|--------|--------|--------|--------|--------|--------|---------------|
| <i>Stomatobaculum</i>                       | 0.0024 | 0.0000 | 0.0075 | 0.0033 | 0.0006 | 0.0051 | 0.7132        |
| <i>Prevotellaceae NK3B31 group</i>          | 0.0000 | 0.0000 | 0.0040 | 0.0000 | 0.0000 | 0.0009 | 0.7001        |
| <i>Lactobacillus</i>                        | 0.0025 | 0.0003 | 0.0051 | 0.0014 | 0.0000 | 0.0028 | 0.2271        |
| <i>Eubacterium eligens group</i>            | 0.0004 | 0.0000 | 0.0060 | 0.0004 | 0.0000 | 0.0021 | 1.0000        |
| <i>Lachnospiraceae GCA-900066575</i>        | 0.0059 | 0.0026 | 0.0185 | 0.0028 | 0.0022 | 0.0077 | 0.1278        |
| <i>Rikenella</i>                            | 0.0020 | 0.0003 | 0.0043 | 0.0040 | 0.0014 | 0.0083 | <b>0.0181</b> |
| <i>Ruminococcus</i>                         | 0.0001 | 0.0000 | 0.0094 | 0.0004 | 0.0000 | 0.0009 | 0.7059        |
| <i>Acetatifactor</i>                        | 0.0083 | 0.0034 | 0.0121 | 0.0061 | 0.0037 | 0.0366 | 0.6365        |
| <i>Lactobacillaceae HT002</i>               | 0.0013 | 0.0002 | 0.0029 | 0.0004 | 0.0000 | 0.0019 | 0.1893        |
| <i>Angelakisella</i>                        | 0.0011 | 0.0002 | 0.0020 | 0.0007 | 0.0002 | 0.0024 | 0.4309        |
| <i>Lachnospiraceae ASF356</i>               | 0.0012 | 0.0000 | 0.0025 | 0.0066 | 0.0001 | 0.0193 | <b>0.0313</b> |
| <i>Lachnospiraceae UCG-006</i>              | 0.0041 | 0.0013 | 0.0084 | 0.0018 | 0.0007 | 0.0022 | 0.0661        |
| <i>Oscillospiraceae UCG-003</i>             | 0.0016 | 0.0008 | 0.0054 | 0.0010 | 0.0006 | 0.0016 | <b>0.0406</b> |
| <i>Eubacterium siraeum group</i>            | 0.0001 | 0.0000 | 0.0019 | 0.0000 | 0.0000 | 0.0003 | 0.1105        |
| <i>Ruminococcaceae UBA1819</i>              | 0.0000 | 0.0000 | 0.0000 | 0.0002 | 0.0000 | 0.0021 | <b>0.0046</b> |
| <i>Dubosiella</i>                           | 0.0030 | 0.0000 | 0.0095 | 0.0002 | 0.0000 | 0.0026 | <b>0.0122</b> |
| <i>Paludicola</i>                           | 0.0015 | 0.0006 | 0.0037 | 0.0013 | 0.0002 | 0.0017 | 0.4309        |
| <i>Lachnospiraceae FCS020 group</i>         | 0.0009 | 0.0003 | 0.0022 | 0.0003 | 0.0000 | 0.0009 | 0.0181        |
| <i>Anaerospobacter</i>                      | 0.0015 | 0.0002 | 0.0031 | 0.0002 | 0.0000 | 0.0005 | <b>0.0100</b> |
| <i>Bilophila</i>                            | 0.0012 | 0.0000 | 0.0044 | 0.0034 | 0.0012 | 0.0116 | 0.1036        |
| <i>Lachnospiraceae UCG-001</i>              | 0.0010 | 0.0000 | 0.0113 | 0.0009 | 0.0003 | 0.0021 | 0.7929        |
| <i>Escherichia-Shigella</i>                 | 0.0001 | 0.0000 | 0.0005 | 0.0003 | 0.0000 | 0.0076 | 0.1222        |
| <i>Oscillospiraceae UCG-002</i>             | 0.0004 | 0.0002 | 0.0018 | 0.0010 | 0.0003 | 0.0038 | 0.1563        |
| <i>Shuttleworthia</i>                       | 0.0011 | 0.0000 | 0.0092 | 0.0010 | 0.0001 | 0.0047 | 0.9581        |
| <i>Eubacterium nodatum group</i>            | 0.0026 | 0.0015 | 0.0057 | 0.0028 | 0.0005 | 0.0062 | 1.0000        |
| <i>Oscillospiraceae V9D2013 group</i>       | 0.0005 | 0.0000 | 0.0011 | 0.0006 | 0.0002 | 0.0012 | 0.8748        |
| <i>Oscillospiraceae NK4A214 group</i>       | 0.0007 | 0.0003 | 0.0022 | 0.0008 | 0.0003 | 0.0018 | 0.9581        |
| <i>Anaerovorax</i>                          | 0.0006 | 0.0000 | 0.0015 | 0.0019 | 0.0008 | 0.0045 | <b>0.0101</b> |
| <i>Roseburia</i>                            | 0.0031 | 0.0014 | 0.0042 | 0.0038 | 0.0014 | 0.0086 | 0.3184        |
| <i>Lachnospiraceae UCG-003</i>              | 0.0000 | 0.0000 | 0.0000 | 0.0008 | 0.0000 | 0.0050 | <b>0.0046</b> |
| <i>Ureaplasma</i>                           | 0.0002 | 0.0000 | 0.0008 | 0.0000 | 0.0000 | 0.0000 | <b>0.0128</b> |
| <i>Faecalibaculum</i>                       | 0.0017 | 0.0002 | 0.0175 | 0.0000 | 0.0000 | 0.0000 | <b>0.0004</b> |
| <i>Christensenellaceae R-7 group</i>        | 0.0012 | 0.0006 | 0.0029 | 0.0004 | 0.0000 | 0.0032 | <b>0.0239</b> |
| <i>Anaerostipes</i>                         | 0.0003 | 0.0000 | 0.0008 | 0.0001 | 0.0000 | 0.0008 | 0.1827        |
| <i>Mobilitalea</i>                          | 0.0003 | 0.0001 | 0.0022 | 0.0001 | 0.0000 | 0.0008 | 0.1250        |
| <i>Lachnospiraceae A2</i>                   | 0.0014 | 0.0008 | 0.0020 | 0.0016 | 0.0002 | 0.0044 | 0.7132        |
| <i>Akkermansia</i>                          | 0.0005 | 0.0000 | 0.0030 | 0.0000 | 0.0000 | 0.0005 | 0.0728        |
| <i>Peptococcus</i>                          | 0.0024 | 0.0008 | 0.0036 | 0.0030 | 0.0023 | 0.0057 | 0.0831        |
| <i>Eubacterium fissicatena group</i>        | 0.0007 | 0.0002 | 0.0019 | 0.0000 | 0.0000 | 0.0003 | <b>0.0034</b> |
| <i>Tyzzarella</i>                           | 0.0000 | 0.0000 | 0.0006 | 0.0013 | 0.0003 | 0.0048 | <b>0.0015</b> |
| <i>Lachnospiraceae UCG-009</i>              | 0.0005 | 0.0000 | 0.0018 | 0.0001 | 0.0000 | 0.0002 | <b>0.0111</b> |
| <i>Monoglobus</i>                           | 0.0009 | 0.0000 | 0.0031 | 0.0002 | 0.0000 | 0.0012 | 0.155         |
| <i>Anaerovoracaceae Family XIII UCG-001</i> | 0.0008 | 0.0002 | 0.0010 | 0.0005 | 0.0000 | 0.0014 | 0.4948        |
| <i>Marvinbryantia</i>                       | 0.0000 | 0.0000 | 0.0005 | 0.0000 | 0.0000 | 0.0008 | 0.8360        |
| <i>Salmonella</i>                           | 0.0001 | 0.0000 | 0.0006 | 0.0002 | 0.0000 | 0.0038 | 0.7840        |
| <i>Lactococcus</i>                          | 0.0000 | 0.0000 | 0.0005 | 0.0000 | 0.0000 | 0.0000 | 0.0764        |

|                                                  |               |            |            |               |            |            |                |
|--------------------------------------------------|---------------|------------|------------|---------------|------------|------------|----------------|
| <i>Anaerovoracaceae</i> Family XIII AD3011 group | 0.0011        | 0.0006     | 0.0022     | 0.0004        | 0.0001     | 0.0016     | 0.052          |
| <i>Lachnospiraceae</i> UCG-004                   | 0.0004        | 0.0002     | 0.0007     | 0.0003        | 0.0000     | 0.0017     | 0.9581         |
| <i>Veillonella</i>                               | 0.0007        | 0.0000     | 0.0015     | 0.0000        | 0.0000     | 0.0000     | <b>0.0015</b>  |
| <i>Merdibacter</i>                               | 0.0000        | 0.0000     | 0.0000     | 0.0000        | 0.0000     | 0.0002     | 0.3816         |
| <i>Lachnospiraceae</i> UC5-1-2E3                 | 0.0002        | 0.0000     | 0.0006     | 0.0001        | 0.0000     | 0.0004     | 0.2630         |
| <i>Olsenella</i>                                 | 0.0002        | 0.0000     | 0.0015     | 0.0000        | 0.0000     | 0.0000     | <b>0.0046</b>  |
| <i>Mycoplasma</i>                                | 0.0000        | 0.0000     | 0.0003     | 0.0000        | 0.0000     | 0.0000     | 0.3816         |
| <i>Lachnospiraceae</i> AC2044 group              | 0.0000        | 0.0000     | 0.0000     | 0.0001        | 0.0000     | 0.0011     | <b>0.0128</b>  |
| <i>Coriobacteriaceae</i> UCG-002                 | 0.0000        | 0.0000     | 0.0005     | 0.0000        | 0.0000     | 0.0002     | 0.2143         |
| <b>Week 24</b>                                   |               |            |            |               |            |            |                |
|                                                  | <b>DIET1</b>  |            |            | <b>DIET2</b>  |            |            | <b>p-value</b> |
|                                                  | <b>Median</b> | <b>Min</b> | <b>Max</b> | <b>Median</b> | <b>Min</b> | <b>Max</b> |                |
| <i>Alloprevotella</i>                            | 0.0792        | 0.0043     | 0.1869     | 0.0584        | 0.0248     | 0.1891     | 0.8748         |
| <i>Lachnoanaerobaculum</i>                       | 0.0085        | 0.0022     | 0.0237     | 0.0265        | 0.0103     | 0.1028     | <b>0.0074</b>  |
| <i>Helicobacter</i>                              | 0.0451        | 0.0119     | 0.0702     | 0.0283        | 0.0065     | 0.0655     | 0.1036         |
| <i>Rikenellaceae</i> RC9 gut group               | 0.0376        | 0.0138     | 0.1366     | 0.0171        | 0.0053     | 0.0288     | 0.0661         |
| <i>Candidatus Saccharimonas</i>                  | 0.0438        | 0.0121     | 0.0573     | 0.0617        | 0.0366     | 0.2069     | <b>0.0181</b>  |
| <i>Bacteroides</i>                               | 0.1807        | 0.0824     | 0.4089     | 0.1238        | 0.0299     | 0.1990     | 0.1278         |
| <i>Prevotellaceae</i> UCG-001                    | 0.0548        | 0.0108     | 0.1315     | 0.0352        | 0.0000     | 0.0733     | 0.2701         |
| <i>Flavonifractor</i>                            | 0.0145        | 0.0071     | 0.0181     | 0.0167        | 0.0112     | 0.0214     | 0.2271         |
| <i>Colidextribacter</i>                          | 0.0340        | 0.0192     | 0.0519     | 0.0396        | 0.0248     | 0.0511     | 0.5635         |
| <i>Parasutterella</i>                            | 0.0396        | 0.0047     | 0.0820     | 0.0504        | 0.0368     | 0.0716     | 0.2271         |
| <i>Odoribacter</i>                               | 0.0180        | 0.0065     | 0.0298     | 0.0091        | 0.0054     | 0.0196     | 0.0831         |
| <i>Lachnospiraceae</i> NK4A136 group             | 0.1037        | 0.0276     | 0.2714     | 0.1476        | 0.0969     | 0.1740     | 0.2271         |
| <i>Intestinimonas</i>                            | 0.0151        | 0.0091     | 0.0501     | 0.0223        | 0.0098     | 0.0329     | 0.7929         |
| <i>Mucispirillum</i>                             | 0.0057        | 0.0010     | 0.0128     | 0.0116        | 0.0004     | 0.0227     | 0.3720         |
| <i>Oscillospira</i>                              | 0.0045        | 0.0028     | 0.0155     | 0.0053        | 0.0034     | 0.0108     | 0.6365         |
| <i>Muribaculum</i>                               | 0.0319        | 0.0178     | 0.1109     | 0.0331        | 0.0146     | 0.0504     | 0.9581         |
| <i>Herbinix</i>                                  | 0.0018        | 0.0004     | 0.0222     | 0.0057        | 0.0013     | 0.0090     | 0.2271         |
| <i>Negativibacillus</i>                          | 0.0013        | 0.0000     | 0.0056     | 0.0087        | 0.0054     | 0.0144     | <b>0.0014</b>  |
| <i>Parabacteroides</i>                           | 0.0301        | 0.0132     | 0.1131     | 0.0172        | 0.0028     | 0.0436     | 0.1036         |
| <i>Alistipes</i>                                 | 0.0223        | 0.0125     | 0.0381     | 0.0102        | 0.0034     | 0.0232     | <b>0.0074</b>  |
| <i>Ruminococcus gnavus</i> group                 | 0.0029        | 0.0012     | 0.0086     | 0.0043        | 0.0021     | 0.0148     | 0.2701         |
| <i>Oscillibacter</i>                             | 0.0080        | 0.0054     | 0.0147     | 0.0103        | 0.0080     | 0.0153     | 0.1893         |
| <i>Ligilactobacillus</i>                         | 0.0033        | 0.0007     | 0.0129     | 0.0142        | 0.0054     | 0.1214     | <b>0.0074</b>  |
| <i>Anaerotruncus</i>                             | 0.0001        | 0.0000     | 0.0003     | 0.0052        | 0.0010     | 0.0155     | <b>0.0009</b>  |
| <i>Eubacterium xylanophilum</i> group            | 0.0061        | 0.0008     | 0.0109     | 0.0067        | 0.0021     | 0.0168     | 0.3184         |
| <i>Prevotella</i> 7                              | 0.0016        | 0.0005     | 0.0032     | 0.0003        | 0.0000     | 0.0019     | <b>0.0308</b>  |
| <i>Harryflintia</i>                              | 0.0015        | 0.0004     | 0.0029     | 0.0047        | 0.0015     | 0.0087     | <b>0.0039</b>  |
| <i>Desulfovibrio</i>                             | 0.0098        | 0.0013     | 0.0233     | 0.0115        | 0.0071     | 0.0323     | 0.2271         |
| <i>Tuzzerella</i>                                | 0.0061        | 0.0022     | 0.0106     | 0.0058        | 0.0034     | 0.0179     | 0.4948         |
| <i>Anaeroplasma</i>                              | 0.0026        | 0.0013     | 0.0128     | 0.0005        | 0.0001     | 0.0022     | <b>0.0028</b>  |
| <i>Butyricoccaceae</i> UCG-009                   | 0.0019        | 0.0004     | 0.0028     | 0.0041        | 0.0012     | 0.0117     | <b>0.0136</b>  |
| <i>Erysipelatoclostridium</i>                    | 0.0014        | 0.0000     | 0.0066     | 0.0000        | 0.0000     | 0.0019     | 0.1783         |
| <i>Ruminococcaceae</i> UCG-001                   | 0.0000        | 0.0000     | 0.0003     | 0.0025        | 0.0000     | 0.0193     | 0.0924         |

|                                             |        |        |        |        |        |        |               |
|---------------------------------------------|--------|--------|--------|--------|--------|--------|---------------|
| <i>Lachnoclostridium</i>                    | 0.0078 | 0.0021 | 0.0224 | 0.0088 | 0.0027 | 0.0144 | 1.0000        |
| <i>Ruminococcaceae Incertae Sedis</i>       | 0.0028 | 0.0019 | 0.0070 | 0.0073 | 0.0028 | 0.0100 | <b>0.0239</b> |
| <i>Butyricoccus</i>                         | 0.0040 | 0.0015 | 0.0156 | 0.0027 | 0.0006 | 0.0063 | 0.3184        |
| <i>Stomatobaculum</i>                       | 0.0015 | 0.0000 | 0.0102 | 0.0008 | 0.0000 | 0.0142 | 0.4619        |
| <i>Prevotellaceae NK3B31 group</i>          | 0.0007 | 0.0000 | 0.0406 | 0.0000 | 0.0000 | 0.0020 | 0.0550        |
| <i>Lactobacillus</i>                        | 0.0002 | 0.0000 | 0.0014 | 0.0147 | 0.0023 | 0.0438 | <b>0.0009</b> |
| <i>Eubacterium eligens group</i>            | 0.0001 | 0.0000 | 0.0057 | 0.0002 | 0.0000 | 0.0025 | 0.7059        |
| <i>Lachnospiraceae GCA-900066575</i>        | 0.0065 | 0.0035 | 0.0148 | 0.0041 | 0.0029 | 0.0067 | 0.0661        |
| <i>Rikenella</i>                            | 0.0013 | 0.0000 | 0.0061 | 0.0028 | 0.0011 | 0.0106 | 0.1278        |
| <i>Ruminococcus</i>                         | 0.0016 | 0.0000 | 0.0050 | 0.0024 | 0.0005 | 0.0065 | 0.2701        |
| <i>Acetatifactor</i>                        | 0.0036 | 0.0002 | 0.0077 | 0.0044 | 0.0021 | 0.0070 | 0.6365        |
| <i>Lactobacillaceae HT002</i>               | 0.0001 | 0.0000 | 0.0005 | 0.0059 | 0.0013 | 0.0136 | <b>0.0009</b> |
| <i>Angelakisella</i>                        | 0.0010 | 0.0002 | 0.0055 | 0.0007 | 0.0002 | 0.0018 | 0.4948        |
| <i>Lachnospiraceae ASF356</i>               | 0.0001 | 0.0000 | 0.0119 | 0.0223 | 0.0075 | 0.0337 | <b>0.0018</b> |
| <i>Lachnospiraceae UCG-006</i>              | 0.0034 | 0.0009 | 0.0110 | 0.0021 | 0.0012 | 0.0061 | 0.3720        |
| <i>Oscillospiraceae UCG-003</i>             | 0.0021 | 0.0003 | 0.0089 | 0.0009 | 0.0001 | 0.0029 | 0.1278        |
| <i>Eubacterium siraeum group</i>            | 0.0011 | 0.0000 | 0.0037 | 0.0006 | 0.0000 | 0.0050 | 0.7923        |
| <i>Ruminococcaceae UBA1819</i>              | 0.0000 | 0.0000 | 0.0000 | 0.0004 | 0.0000 | 0.0075 | <b>0.0325</b> |
| <i>Dubosiella</i>                           | 0.0028 | 0.0003 | 0.0795 | 0.0011 | 0.0000 | 0.0020 | 0.1893        |
| <i>Paludicola</i>                           | 0.0009 | 0.0000 | 0.0022 | 0.0014 | 0.0010 | 0.0029 | 0.1563        |
| <i>Lachnospiraceae FCS020 group</i>         | 0.0007 | 0.0000 | 0.0035 | 0.0001 | 0.0000 | 0.0007 | 0.1706        |
| <i>Anaerosporeobacter</i>                   | 0.0002 | 0.0000 | 0.0012 | 0.0001 | 0.0000 | 0.0005 | 0.3514        |
| <i>Bilophila</i>                            | 0.0035 | 0.0005 | 0.0070 | 0.0009 | 0.0006 | 0.0031 | 0.0661        |
| <i>Lachnospiraceae UCG-001</i>              | 0.0006 | 0.0000 | 0.0017 | 0.0011 | 0.0000 | 0.0089 | 0.2687        |
| <i>Escherichia-Shigella</i>                 | 0.0006 | 0.0002 | 0.0022 | 0.0006 | 0.0000 | 0.0085 | 0.9581        |
| <i>Oscillospiraceae UCG-002</i>             | 0.0003 | 0.0000 | 0.0024 | 0.0008 | 0.0002 | 0.0054 | 0.1278        |
| <i>Shuttleworthia</i>                       | 0.0000 | 0.0000 | 0.0003 | 0.0000 | 0.0000 | 0.0001 | 1.0000        |
| <i>Eubacterium nodatum group</i>            | 0.0016 | 0.0006 | 0.0071 | 0.0083 | 0.0021 | 0.0123 | <b>0.0054</b> |
| <i>Oscillospiraceae V9D2013 group</i>       | 0.0004 | 0.0000 | 0.0017 | 0.0002 | 0.0000 | 0.0014 | 0.5283        |
| <i>Oscillospiraceae NK4A214 group</i>       | 0.0004 | 0.0002 | 0.0008 | 0.0011 | 0.0006 | 0.0017 | <b>0.0014</b> |
| <i>Anaerovorax</i>                          | 0.0006 | 0.0000 | 0.0012 | 0.0024 | 0.0010 | 0.0031 | <b>0.0014</b> |
| <i>Roseburia</i>                            | 0.0031 | 0.0006 | 0.0050 | 0.0044 | 0.0008 | 0.0069 | 0.1893        |
| <i>Lachnospiraceae UCG-003</i>              | 0.0000 | 0.0000 | 0.0014 | 0.0003 | 0.0000 | 0.0119 | 0.0535        |
| <i>Ureaplasma</i>                           | 0.0001 | 0.0000 | 0.0003 | 0.0000 | 0.0000 | 0.0002 | 0.2716        |
| <i>Faecalibaculum</i>                       | 0.0000 | 0.0000 | 0.0017 | 0.0000 | 0.0000 | 0.0005 | 0.9491        |
| <i>Christensenellaceae R-7 group</i>        | 0.0004 | 0.0000 | 0.0029 | 0.0020 | 0.0013 | 0.0070 | <b>0.0136</b> |
| <i>Anaerostipes</i>                         | 0.0001 | 0.0000 | 0.0003 | 0.0004 | 0.0000 | 0.0008 | <b>0.0486</b> |
| <i>Mobilitalea</i>                          | 0.0003 | 0.0000 | 0.0014 | 0.0001 | 0.0000 | 0.0003 | 0.1706        |
| <i>Lachnospiraceae A2</i>                   | 0.0010 | 0.0001 | 0.0033 | 0.0007 | 0.0004 | 0.0016 | 0.7929        |
| <i>Akkermansia</i>                          | 0.0009 | 0.0000 | 0.0071 | 0.0000 | 0.0000 | 0.0026 | 0.3253        |
| <i>Peptococcus</i>                          | 0.0014 | 0.0000 | 0.0026 | 0.0028 | 0.0015 | 0.0065 | <b>0.0054</b> |
| <i>Eubacterium fissicatena group</i>        | 0.0006 | 0.0000 | 0.0026 | 0.0004 | 0.0002 | 0.0011 | 1.0000        |
| <i>Tyzzera</i>                              | 0.0000 | 0.0000 | 0.0000 | 0.0001 | 0.0000 | 0.0014 | <b>0.0325</b> |
| <i>Lachnospiraceae UCG-009</i>              | 0.0002 | 0.0000 | 0.0010 | 0.0000 | 0.0000 | 0.0006 | 0.3695        |
| <i>Monoglobus</i>                           | 0.0001 | 0.0000 | 0.0017 | 0.0012 | 0.0004 | 0.0019 | <b>0.0178</b> |
| <i>Anaerovoracaceae Family XIII UCG-001</i> | 0.0004 | 0.0001 | 0.0010 | 0.0014 | 0.0003 | 0.0020 | <b>0.0054</b> |

|                                                  |        |        |        |        |        |        |               |
|--------------------------------------------------|--------|--------|--------|--------|--------|--------|---------------|
| <i>Marvinbryantia</i>                            | 0.0000 | 0.0000 | 0.0005 | 0.0000 | 0.0000 | 0.0002 | 0.4066        |
| <i>Salmonella</i>                                | 0.0002 | 0.0000 | 0.0004 | 0.0000 | 0.0000 | 0.0002 | <b>0.0496</b> |
| <i>Lactococcus</i>                               | 0.0000 | 0.0000 | 0.0002 | 0.0000 | 0.0000 | 0.0000 | 0.1709        |
| <i>Anaerovoracaceae Family XIII AD3011 group</i> | 0.0007 | 0.0002 | 0.0018 | 0.0011 | 0.0003 | 0.0026 | 0.2271        |
| <i>Lachnospiraceae UCG-004</i>                   | 0.0002 | 0.0000 | 0.0006 | 0.0007 | 0.0002 | 0.0010 | <b>0.0101</b> |
| <i>Veillonella</i>                               | 0.0001 | 0.0000 | 0.0011 | 0.0000 | 0.0000 | 0.0002 | 0.0535        |
| <i>Merdibacter</i>                               | 0.0000 | 0.0000 | 0.0002 | 0.0000 | 0.0000 | 0.0014 | 0.3342        |
| <i>Lachnospiraceae UC5-1-2E3</i>                 | 0.0000 | 0.0000 | 0.0005 | 0.0001 | 0.0000 | 0.0005 | 0.7723        |
| <i>Olsenella</i>                                 | 0.0002 | 0.0000 | 0.0006 | 0.0000 | 0.0000 | 0.0007 | 0.2976        |
| <i>Mycoplasma</i>                                | 0.0000 | 0.0000 | 0.0000 | 0.0000 | 0.0000 | 0.0006 | 0.3816        |
| <i>Lachnospiraceae AC2044 group</i>              | 0.0000 | 0.0000 | 0.0000 | 0.0003 | 0.0000 | 0.0009 | <b>0.0046</b> |
| <i>Coriobacteriaceae UCG-002</i>                 | 0.0002 | 0.0000 | 0.0005 | 0.0000 | 0.0000 | 0.0002 | <b>0.0402</b> |
| <i>Faecalibacterium</i>                          | 0.0003 | 0.0000 | 0.0006 | 0.0000 | 0.0000 | 0.0004 | <b>0.0496</b> |

**Supplementary Table S3:** Relative abundance comparison between diet groups at Genus level in the different weeks of study. Significant differences established using the Wilcoxon signed-rank test ( $p < 0.05$ ). p-values in bold style were statistically significant.

---

**Supplementary Table S4: Blood metabolic parameters comparison****Supplementary Table S4: Blood metabolic parameters comparison**

|                       | DIET 1 |      | DIET 2 |      | p-value          |
|-----------------------|--------|------|--------|------|------------------|
|                       | Mean   | SD   | Mean   | SD   |                  |
| Body weight (g)       | 34.6   | 3.0  | 49.6   | 5.0  | <b>0.0039</b>    |
| VAT weight (g)        | 1.3    | 0.2  | 2.5    | 0.3  | <b>0.0007</b>    |
| Glucose (mg/dL)       | 169    | 34   | 187    | 18   | 0.3882           |
| Cholesterol (mg/dL)   | 128    | 13   | 214    | 11   | <b>5.641e-05</b> |
| Triglycerides (mg/dL) | 78     | 14   | 113    | 11   | <b>0.0095</b>    |
| HDL-c (mg/dL)         | 101    | 11   | 178    | 9    | <b>4.011e-05</b> |
| LDL-c (mg/dL)         | 12     | 2    | 14     | 7    | 0.4952           |
| AST (UI/L)            | 71     | 38   | 87     | 33   | 0.5497           |
| ALT (UI/L)            | 15     | 7    | 19     | 13   | 0.6066           |
| Leptin (pg/mL)        | 13286  | 9891 | 51042  | 1421 | <b>0.0042</b>    |
| Adiponectin (ng/mL)   | 3266   | 534  | 3209   | 180  | 0.8505           |

**Supplementary Table S4:** Body and VAT weight and Blood metabolic parameters comparison for groups D1 and D2 at week 24 of feeding. Significant differences established using two-tailed Student's t-test ( $p < 0.05$ ). p-values in bold style were statistically significant.

**Abbreviations:** SD: standard deviation, VAT: visceral adipose tissue, HDL-c: high-density lipoprotein cholesterol, LDL-c: low-density lipoprotein cholesterol, AST: aspartate aminotransferase, ALT: alanine aminotransferase

**Supplementary Table S5: Immune cells population in TAV comparison**

**Supplementary Table S5: Immune cells population in TAV comparison**

| <i>Parameter</i>                    | <b>DIET 1</b> |           | <b>DIET 2</b> |           | <b>p-value</b> |
|-------------------------------------|---------------|-----------|---------------|-----------|----------------|
|                                     | <b>Mean</b>   | <b>SD</b> | <b>Mean</b>   | <b>SD</b> |                |
| % CD11b+                            | 32.7          | 11.5      | 5.5           | 3.1       | <b>0.0150</b>  |
| % CD11b+ CD36+                      | 48.9          | 16.8      | 20.0          | 6.8       | <b>0.0336</b>  |
| % CD11b+ F4/80+                     | 31.3          | 12.0      | 10.9          | 5.7       | <b>0.0342</b>  |
| % CD11b+ F4/80+ CD36+               | 55.8          | 9.3       | 32.9          | 6.0       | <b>0.0086</b>  |
| % CD11b+ F4/80+ CD206- CD11c+       | 40.0          | 9.7       | 21.7          | 5.0       | <b>0.0233</b>  |
| MFI CD11b+ F4/80+ CD206- CD11c+ ROS | 46.8          | 14.9      | 16.4          | 4.6       | <b>0.0221</b>  |
| % CD11b+ F4/80+ CD206+ CD11c+       | 24.1          | 8.1       | 13.6          | 1.8       | <b>0.0221</b>  |
| % CD11b+ F4/80+ CD206- CD11c-       | 0.3           | 0.2       | 0.3           | 0.2       | 1.0000         |
| % CD11b+ F4/80+ CD206- CD11c-       | 12.7          | 7.8       | 5.7           | 2.8       | 0.1717         |
| MFI CD11b+ F4/80+ ROS               | 46.4          | 15.7      | 15.5          | 3.9       | <b>0.0258</b>  |
| MFI CD11b+ ROS                      | 37.0          | 14.8      | 8.2           | 2.6       | <b>0.0281</b>  |
| % CD11b-                            | 41.2          | 11.5      | 35.1          | 5.3       | 0.3869         |
| % CD11b- CD36+                      | 35.6          | 20.7      | 3.9           | 2.2       | 0.0540         |
| % Leukocytes CD36+                  | 42.4          | 18.9      | 6.4           | 4.1       | <b>0.0288</b>  |
| MFI Leukocytes ROS                  | 34.4          | 11.9      | 3.5           | 2.1       | <b>0.0126</b>  |

**Supplementary Table S5: Comparison immune cells population in VAT for D1 and D2 groups at week 24 of feeding. Significant differences established using two-tailed Student's t test ( $p < 0.05$ ). p-values in bold style were statistically significant.**

**Abbreviations:** SD: standard deviation range, CD: cluster of differentiation, ROS: reactive oxygen species.



---

**Supplementary Table S6: variables showing significant correlation****Supplementary Table S6: variables showing significant correlation**

| Genus                                 | Variable    | r     | p-value |
|---------------------------------------|-------------|-------|---------|
| <i>Candidatus Saccharimonas</i>       | Body Weight | 0,74  | 0,0365  |
| <i>Negativibacillus</i>               | Body Weight | 0,77  | 0,0245  |
| <i>Anaerotruncus</i>                  | Body Weight | 0,9   | 0,0023  |
| <i>Harryflintia</i>                   | Body Weight | 0,72  | 0,0445  |
| <i>Butyricicoccaceae UCG-009</i>      | Body Weight | 0,72  | 0,0431  |
| <i>Ruminococcaceae Incertae Sedis</i> | Body Weight | 0,71  | 0,0476  |
| <i>Alistipes</i>                      | Body Weight | -0,73 | 0,0414  |
| <i>Lactobacillus</i>                  | Body Weight | 0,85  | 0,0074  |
| <i>Lachnospiraceae GCA-900066575</i>  | Body Weight | -0,78 | 0,021   |
| <i>Lactobacillaceae HT002</i>         | Body Weight | 0,82  | 0,0133  |
| <i>Lachnospiraceae ASF356</i>         | Body Weight | 0,85  | 0,0081  |
| <i>Anaerovorax</i>                    | Body Weight | 0,92  | 0,0012  |
| <i>Peptococcus</i>                    | Body Weight | 0,77  | 0,0252  |
| <i>Anaerostipes</i>                   | Body Weight | 0,78  | 0,0233  |
| <i>Monoglobus</i>                     | Body Weight | 0,77  | 0,0268  |
| <i>Lachnospiraceae UCG-004</i>        | Body Weight | 0,77  | 0,0248  |
| <i>Lachnospiraceae AC2044 group</i>   | Body Weight | 0,79  | 0,0199  |
| <i>Negativibacillus</i>               | VAT Weight  | 0,81  | 0,014   |
| <i>Anaerotruncus</i>                  | VAT Weight  | 0,87  | 0,0054  |
| <i>Harryflintia</i>                   | VAT Weight  | 0,71  | 0,0479  |
| <i>Ruminococcaceae Incertae Sedis</i> | VAT Weight  | 0,73  | 0,0394  |
| <i>Alistipes</i>                      | VAT Weight  | -0,73 | 0,0416  |
| <i>Lactobacillus</i>                  | VAT Weight  | 0,89  | 0,0033  |
| <i>Lachnospiraceae GCA-900066575</i>  | VAT Weight  | -0,79 | 0,0207  |
| <i>Lactobacillaceae HT002</i>         | VAT Weight  | 0,84  | 0,0087  |
| <i>Lachnospiraceae ASF356</i>         | VAT Weight  | 0,85  | 0,0071  |
| <i>Anaerovorax</i>                    | VAT Weight  | 0,88  | 0,0037  |
| <i>Peptococcus</i>                    | VAT Weight  | 0,76  | 0,0274  |
| <i>Anaerostipes</i>                   | VAT Weight  | 0,8   | 0,0171  |
| <i>Monoglobus</i>                     | VAT Weight  | 0,75  | 0,0324  |
| <i>Lachnospiraceae UCG-004</i>        | VAT Weight  | 0,78  | 0,0237  |
| <i>Lachnospiraceae AC2044 group</i>   | VAT Weight  | 0,73  | 0,0418  |
| <i>Muribaculum</i>                    | Glucose     | 0,71  | 0,0485  |
| <i>Odoribacter</i>                    | Glucose     | -0,79 | 0,0195  |
| <i>Anaeroplasma</i>                   | Glucose     | -0,85 | 0,0075  |
| <i>Prevotellaceae NK3B31 group</i>    | Glucose     | -0,75 | 0,0315  |
| <i>Eubacterium eligens group</i>      | Glucose     | -0,8  | 0,0179  |
| <i>Angelakisella</i>                  | Glucose     | -0,83 | 0,011   |
| <i>Lachnospiraceae FCS020 group</i>   | Glucose     | -0,82 | 0,0127  |
| <i>Bilophila</i>                      | Glucose     | -0,87 | 0,0052  |
| <i>Negativibacillus</i>               | Cholesterol | 0,81  | 0,0159  |
| <i>Ligilactobacillus</i>              | Cholesterol | 0,87  | 0,0045  |
| <i>Ruminococcaceae Incertae Sedis</i> | Cholesterol | 0,78  | 0,0232  |

|                                       |               |       |          |
|---------------------------------------|---------------|-------|----------|
| <i>Lactobacillus</i>                  | Cholesterol   | 0,89  | 0,0034   |
| <i>Lachnospiraceae</i> GCA-900066575  | Cholesterol   | -0,73 | 0,0387   |
| <i>Lactobacillaceae</i> HT002         | Cholesterol   | 0,8   | 0,0177   |
| <i>Lachnospiraceae</i> ASF356         | Cholesterol   | 0,76  | 0,0302   |
| <i>Peptococcus</i>                    | Cholesterol   | 0,75  | 0,033    |
| <i>Christensenellaceae</i> R-7 group  | Cholesterol   | 0,74  | 0,0347   |
| <i>Anaerostipes</i>                   | Cholesterol   | 0,86  | 0,0061   |
| <i>Lachnospiraceae</i> UCG-004        | Cholesterol   | 0,72  | 0,0438   |
| <i>Lachnoanaerobaculum</i>            | Triglycerides | 0,74  | 0,0361   |
| <i>Rikenellaceae</i> RC9 gut group    | Triglycerides | -0,74 | 0,0368   |
| <i>Negativibacillus</i>               | Triglycerides | 0,98  | 1.25E-05 |
| <i>Ligilactobacillus</i>              | Triglycerides | 0,71  | 0,0479   |
| <i>Harryflintia</i>                   | Triglycerides | 0,82  | 0,0126   |
| <i>Lactobacillus</i>                  | Triglycerides | 0,88  | 0,0044   |
| <i>Lactobacillaceae</i> HT002         | Triglycerides | 0,86  | 0,0065   |
| <i>Oscillospiraceae</i> UCG-003       | Triglycerides | -0,75 | 0,0308   |
| <i>Oscillospiraceae</i> NK4A214 group | Triglycerides | 0,72  | 0,0459   |
| <i>Peptococcus</i>                    | Triglycerides | 0,72  | 0,0444   |
| <i>Christensenellaceae</i> R-7 group  | Triglycerides | 0,8   | 0,0181   |
| <i>Lachnospiraceae</i> UCG-004        | Triglycerides | 0,88  | 0,0044   |
| <i>Negativibacillus</i>               | HDL-c         | 0,8   | 0,0172   |
| <i>Ligilactobacillus</i>              | HDL-c         | 0,9   | 0,0021   |
| <i>Ruminococcaceae</i> Incertae Sedis | HDL-c         | 0,74  | 0,0371   |
| <i>Alistipes</i>                      | HDL-c         | -0,72 | 0,0455   |
| <i>Lactobacillus</i>                  | HDL-c         | 0,88  | 0,0038   |
| <i>Lachnospiraceae</i> GCA-900066575  | HDL-c         | -0,72 | 0,0432   |
| <i>Lactobacillaceae</i> HT002         | HDL-c         | 0,8   | 0,0171   |
| <i>Eubacterium nodatum</i> group      | HDL-c         | 0,72  | 0,0432   |
| <i>Peptococcus</i>                    | HDL-c         | 0,78  | 0,0233   |
| <i>Christensenellaceae</i> R-7 group  | HDL-c         | 0,77  | 0,0269   |
| <i>Anaerostipes</i>                   | HDL-c         | 0,85  | 0,008    |
| <i>Lachnospiraceae</i> UCG-004        | HDL-c         | 0,72  | 0,0419   |
| <i>Ruminococcaceae</i> Incertae Sedis | LDL-c         | 0,75  | 0,033    |
| <i>Alloprevotella</i>                 | AST           | 0,86  | 0,0063   |
| <i>Odoribacter</i>                    | AST           | -0,73 | 0,0382   |
| <i>Escherichia-Shigella</i>           | AST           | 0,81  | 0,0147   |
| <i>Oscillospiraceae</i> V9D2013 group | AST           | -0,81 | 0,0139   |
| <i>Escherichia-Shigella</i>           | ALT           | 0,83  | 0,01     |
| <i>Christensenellaceae</i> R-7 group  | ALT           | 0,79  | 0,0191   |
| <i>Rikenellaceae</i> RC9 gut group    | Leptin        | -0,72 | 0,0444   |
| <i>Negativibacillus</i>               | Leptin        | 0,83  | 0,0099   |
| <i>Ligilactobacillus</i>              | Leptin        | 0,82  | 0,0127   |
| <i>Anaerotruncus</i>                  | Leptin        | 0,72  | 0,0454   |
| <i>Ruminococcaceae</i> Incertae Sedis | Leptin        | 0,73  | 0,0395   |
| <i>Alistipes</i>                      | Leptin        | -0,77 | 0,0255   |
| <i>Lactobacillus</i>                  | Leptin        | 0,89  | 0,0028   |

|                                       |             |       |        |
|---------------------------------------|-------------|-------|--------|
| <i>Lachnospiraceae</i> GCA-900066575  | Leptin      | -0,76 | 0,0276 |
| <i>Lactobacillaceae</i> HT002         | Leptin      | 0,83  | 0,0107 |
| <i>Eubacterium nodatum</i> group      | Leptin      | 0,72  | 0,0425 |
| <i>Lachnospiraceae</i> ASF356         | Leptin      | 0,78  | 0,0235 |
| <i>Anaerovorax</i>                    | Leptin      | 0,8   | 0,0183 |
| <i>Peptococcus</i>                    | Leptin      | 0,85  | 0,0069 |
| <i>Christensenellaceae</i> R-7 group  | Leptin      | 0,76  | 0,03   |
| <i>Anaerostipes</i>                   | Leptin      | 0,79  | 0,019  |
| <i>Lachnospiraceae</i> UCG-004        | Leptin      | 0,83  | 0,0105 |
| <i>Eubacterium xylanophilum</i> group | Adiponectin | 0,71  | 0,048  |
| <i>Lachnospiraceae</i> FCS020 group   | Adiponectin | 0,82  | 0,0125 |
| <i>Eubacterium fissicatena</i> group  | Adiponectin | 0,78  | 0,0211 |
| <i>Salmonella</i>                     | Adiponectin | 0,81  | 0,0157 |

| Genus                                       | Inmune cells variable | r     | p-value |
|---------------------------------------------|-----------------------|-------|---------|
| <i>Lachnoanaerobaculum</i>                  | % CD11b+              | -0,76 | 0,0291  |
| <i>Rikenellaceae</i> RC9 gut group          | % CD11b+              | 0,88  | 0,0038  |
| <i>Negativibacillus</i>                     | % CD11b+              | -0,8  | 0,0162  |
| <i>Ligilactobacillus</i>                    | % CD11b+              | -0,74 | 0,0346  |
| <i>Parabacteroides</i>                      | % CD11b+              | 0,79  | 0,0191  |
| <i>Alistipes</i>                            | % CD11b+              | 0,78  | 0,0216  |
| <i>Lactobacillus</i>                        | % CD11b+              | -0,8  | 0,0179  |
| <i>Lactobacillaceae</i> HT002               | % CD11b+              | -0,75 | 0,0337  |
| <i>Eubacterium nodatum</i> group            | % CD11b+              | -0,77 | 0,0248  |
| <i>Anaerovorax</i>                          | % CD11b+              | -0,77 | 0,0241  |
| <i>Peptococcus</i>                          | % CD11b+              | -0,84 | 0,0087  |
| <i>Christensenellaceae</i> R-7 group        | % CD11b+              | -0,73 | 0,0391  |
| <i>Anaerostipes</i>                         | % CD11b+              | -0,73 | 0,0383  |
| <i>Lachnospiraceae</i> UCG-004              | % CD11b+              | -0,83 | 0,0106  |
| <i>Anaerovoracaceae</i> Family XIII UCG-001 | % CD11b+              | -0,79 | 0,0202  |
| <i>Lachnoanaerobaculum</i>                  | % CD11b+ CD36+        | -0,74 | 0,0359  |
| <i>Rikenellaceae</i> RC9 gut group          | % CD11b+ CD36+        | 0,91  | 0,0019  |
| <i>Bacteroides</i>                          | % CD11b+ CD36+        | 0,84  | 0,0096  |
| <i>Parabacteroides</i>                      | % CD11b+ CD36+        | 0,89  | 0,0028  |
| <i>Desulfovibrio</i>                        | % CD11b+ CD36+        | -0,71 | 0,0484  |
| <i>Butyricicoccaceae</i> UCG-009            | % CD11b+ CD36+        | -0,74 | 0,0371  |
| <i>Tuzzerella</i>                           | % CD11b+ CD36+        | -0,75 | 0,0303  |
| <i>Eubacterium nodatum</i> group            | % CD11b+ CD36+        | -0,72 | 0,0452  |
| <i>Anaerovorax</i>                          | % CD11b+ CD36+        | -0,78 | 0,0222  |
| <i>Peptococcus</i>                          | % CD11b+ CD36+        | -0,74 | 0,0369  |
| <i>Monoglobus</i>                           | % CD11b+ CD36+        | -0,74 | 0,0342  |
| <i>Lachnospiraceae</i> UCG-004              | % CD11b+ CD36+        | -0,74 | 0,0364  |
| <i>Anaerovoracaceae</i> Family XIII UCG-001 | % CD11b+ CD36+        | -0,8  | 0,0162  |
| <i>Lachnoanaerobaculum</i>                  | % CD11b+ F4/80+       | -0,76 | 0,0271  |
| <i>Rikenellaceae</i> RC9 gut group          | % CD11b+ F4/80+       | 0,92  | 0,001   |
| <i>Bacteroides</i>                          | % CD11b+ F4/80+       | 0,77  | 0,0255  |

|                                             |                                     |       |        |
|---------------------------------------------|-------------------------------------|-------|--------|
| <i>Negativibacillus</i>                     | % CD11b+ F4/80+                     | -0,74 | 0,0362 |
| <i>Parabacteroides</i>                      | % CD11b+ F4/80+                     | 0,85  | 0,0072 |
| <i>Alistipes</i>                            | % CD11b+ F4/80+                     | 0,87  | 0,005  |
| <i>Eubacterium nodatum group</i>            | % CD11b+ F4/80+                     | -0,82 | 0,0125 |
| <i>Anaerovorax</i>                          | % CD11b+ F4/80+                     | -0,75 | 0,0311 |
| <i>Peptococcus</i>                          | % CD11b+ F4/80+                     | -0,83 | 0,0101 |
| <i>Anaerostipes</i>                         | % CD11b+ F4/80+                     | -0,72 | 0,0462 |
| <i>Lachnospiraceae UCG-004</i>              | % CD11b+ F4/80+                     | -0,82 | 0,0135 |
| <i>Anaerovoracaceae Family XIII UCG-001</i> | % CD11b+ F4/80+                     | -0,85 | 0,0069 |
| <i>Rikenellaceae RC9 gut group</i>          | % CD11b+ F4/80+ CD36+               | 0,86  | 0,0067 |
| <i>Bacteroides</i>                          | % CD11b+ F4/80+ CD36+               | 0,71  | 0,0477 |
| <i>Negativibacillus</i>                     | % CD11b+ F4/80+ CD36+               | -0,76 | 0,0279 |
| <i>Oscillibacter</i>                        | % CD11b+ F4/80+ CD36+               | -0,72 | 0,0446 |
| <i>Anaerotruncus</i>                        | % CD11b+ F4/80+ CD36+               | -0,79 | 0,02   |
| <i>Parabacteroides</i>                      | % CD11b+ F4/80+ CD36+               | 0,78  | 0,0235 |
| <i>Harryflintia</i>                         | % CD11b+ F4/80+ CD36+               | -0,74 | 0,0378 |
| <i>Butyricicoccaceae UCG-009</i>            | % CD11b+ F4/80+ CD36+               | -0,75 | 0,0329 |
| <i>Ruminococcaceae Incertae Sedis</i>       | % CD11b+ F4/80+ CD36+               | -0,79 | 0,0209 |
| <i>Alistipes</i>                            | % CD11b+ F4/80+ CD36+               | 0,71  | 0,048  |
| <i>Lactobacillus</i>                        | % CD11b+ F4/80+ CD36+               | -0,79 | 0,0199 |
| <i>Tuzzerella</i>                           | % CD11b+ F4/80+ CD36+               | -0,71 | 0,0481 |
| <i>Lactobacillaceae HT002</i>               | % CD11b+ F4/80+ CD36+               | -0,74 | 0,0352 |
| <i>Lachnospiraceae ASF356</i>               | % CD11b+ F4/80+ CD36+               | -0,78 | 0,0231 |
| <i>Anaerovorax</i>                          | % CD11b+ F4/80+ CD36+               | -0,88 | 0,0039 |
| <i>Peptococcus</i>                          | % CD11b+ F4/80+ CD36+               | -0,73 | 0,0408 |
| <i>Anaerostipes</i>                         | % CD11b+ F4/80+ CD36+               | -0,77 | 0,0252 |
| <i>Monoglobus</i>                           | % CD11b+ F4/80+ CD36+               | -0,76 | 0,0292 |
| <i>Lachnospiraceae UCG-004</i>              | % CD11b+ F4/80+ CD36+               | -0,77 | 0,0262 |
| <i>Anaerovoracaceae Family XIII UCG-001</i> | % CD11b+ F4/80+ CD36+               | -0,72 | 0,0452 |
| <i>Rikenellaceae RC9 gut group</i>          | % CD11b+ F4/80+ CD206- CD11c+       | 0,72  | 0,0433 |
| <i>Negativibacillus</i>                     | % CD11b+ F4/80+ CD206- CD11c+       | -0,79 | 0,0202 |
| <i>Anaerotruncus</i>                        | % CD11b+ F4/80+ CD206- CD11c+       | -0,71 | 0,0495 |
| <i>Alistipes</i>                            | % CD11b+ F4/80+ CD206- CD11c+       | 0,9   | 0,0025 |
| <i>Lactobacillus</i>                        | % CD11b+ F4/80+ CD206- CD11c+       | -0,71 | 0,0494 |
| <i>Lachnospiraceae GCA-900066575</i>        | % CD11b+ F4/80+ CD206- CD11c+       | 0,81  | 0,0156 |
| <i>Eubacterium nodatum group</i>            | % CD11b+ F4/80+ CD206- CD11c+       | -0,72 | 0,0446 |
| <i>Lachnospiraceae ASF356</i>               | % CD11b+ F4/80+ CD206- CD11c+       | -0,84 | 0,0097 |
| <i>Anaerovorax</i>                          | % CD11b+ F4/80+ CD206- CD11c+       | -0,78 | 0,0222 |
| <i>Peptococcus</i>                          | % CD11b+ F4/80+ CD206- CD11c+       | -0,78 | 0,0231 |
| <i>Anaerostipes</i>                         | % CD11b+ F4/80+ CD206- CD11c+       | -0,76 | 0,0279 |
| <i>Lachnospiraceae UCG-004</i>              | % CD11b+ F4/80+ CD206- CD11c+       | -0,8  | 0,016  |
| <i>Lachnoanaerobaculum</i>                  | MFI CD11b+ F4/80+ CD206- CD11c+ ROS | -0,71 | 0,0492 |
| <i>Negativibacillus</i>                     | MFI CD11b+ F4/80+ CD206- CD11c+ ROS | -0,83 | 0,0114 |
| <i>Ligilactobacillus</i>                    | MFI CD11b+ F4/80+ CD206- CD11c+ ROS | -0,79 | 0,021  |
| <i>Anaeroplasma</i>                         | MFI CD11b+ F4/80+ CD206- CD11c+ ROS | 0,77  | 0,0245 |
| <i>Alistipes</i>                            | MFI CD11b+ F4/80+ CD206- CD11c+ ROS | 0,79  | 0,0188 |

|                                       |                                     |       |          |
|---------------------------------------|-------------------------------------|-------|----------|
| <i>Lactobacillus</i>                  | MFI CD11b+ F4/80+ CD206- CD11c+ ROS | -0,84 | 0,0092   |
| <i>Lachnospiraceae</i> GCA-900066575  | MFI CD11b+ F4/80+ CD206- CD11c+ ROS | 0,81  | 0,0147   |
| <i>Lactobacillaceae</i> HT002         | MFI CD11b+ F4/80+ CD206- CD11c+ ROS | -0,8  | 0,0178   |
| <i>Eubacterium nodatum</i> group      | MFI CD11b+ F4/80+ CD206- CD11c+ ROS | -0,71 | 0,0483   |
| <i>Lachnospiraceae</i> ASF356         | MFI CD11b+ F4/80+ CD206- CD11c+ ROS | -0,73 | 0,0412   |
| <i>Lachnospiraceae</i> FCS020 group   | MFI CD11b+ F4/80+ CD206- CD11c+ ROS | 0,71  | 0,0493   |
| <i>Bilophila</i>                      | MFI CD11b+ F4/80+ CD206- CD11c+ ROS | 0,73  | 0,0385   |
| <i>Anaerovorax</i>                    | MFI CD11b+ F4/80+ CD206- CD11c+ ROS | -0,74 | 0,0343   |
| <i>Peptococcus</i>                    | MFI CD11b+ F4/80+ CD206- CD11c+ ROS | -0,92 | 0,0011   |
| <i>Christensenellaceae</i> R-7 group  | MFI CD11b+ F4/80+ CD206- CD11c+ ROS | -0,81 | 0,0141   |
| <i>Lachnospiraceae</i> UCG-004        | MFI CD11b+ F4/80+ CD206- CD11c+ ROS | -0,9  | 0,0022   |
| <i>Rikenellaceae</i> RC9 gut group    | % CD11b+ F4/80+ CD206+ CD11c+       | 0,74  | 0,0344   |
| <i>Negativibacillus</i>               | % CD11b+ F4/80+ CD206+ CD11c+       | -0,9  | 0,0022   |
| <i>Harryflintia</i>                   | % CD11b+ F4/80+ CD206+ CD11c+       | -0,77 | 0,0264   |
| <i>Lachnospiraceae</i> ASF356         | % CD11b+ F4/80+ CD206+ CD11c+       | -0,73 | 0,0392   |
| <i>Lachnospiraceae</i> UCG-004        | % CD11b+ F4/80+ CD206+ CD11c+       | -0,74 | 0,0364   |
| <i>Lachnospiraceae</i> FCS020 group   | % CD11b+ F4/80+ CD206- CD11c-       | 0,9   | 0,0025   |
| <i>Bilophila</i>                      | % CD11b+ F4/80+ CD206- CD11c-       | 0,77  | 0,0248   |
| <i>Salmonella</i>                     | % CD11b+ F4/80+ CD206- CD11c-       | 0,93  | 8.00E-04 |
| <i>Negativibacillus</i>               | MFI CD11b+ F4/80+ ROS               | -0,75 | 0,0308   |
| <i>Ligilactobacillus</i>              | MFI CD11b+ F4/80+ ROS               | -0,8  | 0,0166   |
| <i>Anaeroplasma</i>                   | MFI CD11b+ F4/80+ ROS               | 0,77  | 0,0239   |
| <i>Alistipes</i>                      | MFI CD11b+ F4/80+ ROS               | 0,75  | 0,0327   |
| <i>Lactobacillus</i>                  | MFI CD11b+ F4/80+ ROS               | -0,83 | 0,0112   |
| <i>Lachnospiraceae</i> GCA-900066575  | MFI CD11b+ F4/80+ ROS               | 0,82  | 0,0136   |
| <i>Lactobacillaceae</i> HT002         | MFI CD11b+ F4/80+ ROS               | -0,79 | 0,0208   |
| <i>Eubacterium nodatum</i> group      | MFI CD11b+ F4/80+ ROS               | -0,74 | 0,0346   |
| <i>Lachnospiraceae</i> FCS020 group   | MFI CD11b+ F4/80+ ROS               | 0,8   | 0,0173   |
| <i>Bilophila</i>                      | MFI CD11b+ F4/80+ ROS               | 0,78  | 0,0213   |
| <i>Oscillospiraceae</i> NK4A214 group | MFI CD11b+ F4/80+ ROS               | -0,72 | 0,0435   |
| <i>Anaerovorax</i>                    | MFI CD11b+ F4/80+ ROS               | -0,74 | 0,0375   |
| <i>Peptococcus</i>                    | MFI CD11b+ F4/80+ ROS               | -0,94 | 6.00E-04 |
| <i>Christensenellaceae</i> R-7 group  | MFI CD11b+ F4/80+ ROS               | -0,82 | 0,0132   |
| <i>Lachnospiraceae</i> UCG-004        | MFI CD11b+ F4/80+ ROS               | -0,86 | 0,0064   |
| <i>Lachnoanaerobaculum</i>            | MFI CD11b+ ROS                      | -0,71 | 0,0484   |
| <i>Negativibacillus</i>               | MFI CD11b+ ROS                      | -0,74 | 0,0344   |
| <i>Ligilactobacillus</i>              | MFI CD11b+ ROS                      | -0,8  | 0,0164   |
| <i>Anaeroplasma</i>                   | MFI CD11b+ ROS                      | 0,75  | 0,0308   |
| <i>Alistipes</i>                      | MFI CD11b+ ROS                      | 0,79  | 0,0209   |
| <i>Lactobacillus</i>                  | MFI CD11b+ ROS                      | -0,81 | 0,0156   |
| <i>Lachnospiraceae</i> GCA-900066575  | MFI CD11b+ ROS                      | 0,81  | 0,0149   |
| <i>Lactobacillaceae</i> HT002         | MFI CD11b+ ROS                      | -0,77 | 0,0255   |
| <i>Eubacterium nodatum</i> group      | MFI CD11b+ ROS                      | -0,81 | 0,0152   |
| <i>Lachnospiraceae</i> FCS020 group   | MFI CD11b+ ROS                      | 0,8   | 0,0169   |
| <i>Bilophila</i>                      | MFI CD11b+ ROS                      | 0,78  | 0,0231   |
| <i>Oscillospiraceae</i> NK4A214 group | MFI CD11b+ ROS                      | -0,74 | 0,0343   |

|                                             |                    |       |          |
|---------------------------------------------|--------------------|-------|----------|
| <i>Anaerovorax</i>                          | MFI CD11b+ ROS     | -0,75 | 0,0315   |
| <i>Peptococcus</i>                          | MFI CD11b+ ROS     | -0,96 | 2.00E-04 |
| <i>Christensenellaceae R-7 group</i>        | MFI CD11b+ ROS     | -0,79 | 0,0201   |
| <i>Lachnospiraceae UCG-004</i>              | MFI CD11b+ ROS     | -0,86 | 0,0062   |
| <i>Lachnospiraceae NK4A136 group</i>        | % CD11b-           | 0,81  | 0,014    |
| <i>Herbinix</i>                             | % CD11b-           | 0,76  | 0,0275   |
| <i>Anaeroplasm</i>                          | % CD11b-           | 0,75  | 0,0323   |
| <i>Prevotellaceae NK3B31 group</i>          | % CD11b-           | 0,83  | 0,0111   |
| <i>Lachnospiraceae GCA-900066575</i>        | % CD11b-           | 0,8   | 0,0162   |
| <i>Angelakisella</i>                        | % CD11b-           | 0,79  | 0,0197   |
| <i>Anaerospiribacter</i>                    | % CD11b-           | 0,79  | 0,0206   |
| <i>Marvinbryantia</i>                       | % CD11b-           | 0,85  | 0,0082   |
| <i>Rikenellaceae RC9 gut group</i>          | % CD11b- CD36+     | 0,89  | 0,0033   |
| <i>Bacteroides</i>                          | % CD11b- CD36+     | 0,72  | 0,0431   |
| <i>Negativibacillus</i>                     | % CD11b- CD36+     | -0,83 | 0,0108   |
| <i>Parabacteroides</i>                      | % CD11b- CD36+     | 0,86  | 0,0065   |
| <i>Harryflintia</i>                         | % CD11b- CD36+     | -0,72 | 0,0425   |
| <i>Lactobacillus</i>                        | % CD11b- CD36+     | -0,72 | 0,0444   |
| <i>Lachnospiraceae UCG-004</i>              | % CD11b- CD36+     | -0,73 | 0,0387   |
| <i>Lachnoanaerobaculum</i>                  | % Leukocytes CD36+ | -0,71 | 0,0465   |
| <i>Rikenellaceae RC9 gut group</i>          | % Leukocytes CD36+ | 0,89  | 0,0029   |
| <i>Bacteroides</i>                          | % Leukocytes CD36+ | 0,75  | 0,0309   |
| <i>Negativibacillus</i>                     | % Leukocytes CD36+ | -0,81 | 0,0157   |
| <i>Parabacteroides</i>                      | % Leukocytes CD36+ | 0,87  | 0,0055   |
| <i>Harryflintia</i>                         | % Leukocytes CD36+ | -0,71 | 0,048    |
| <i>Lactobacillus</i>                        | % Leukocytes CD36+ | -0,76 | 0,0285   |
| <i>Lactobacillaceae HT002</i>               | % Leukocytes CD36+ | -0,71 | 0,0469   |
| <i>Anaerovorax</i>                          | % Leukocytes CD36+ | -0,72 | 0,0439   |
| <i>Monoglobus</i>                           | % Leukocytes CD36+ | -0,72 | 0,0432   |
| <i>Lachnospiraceae UCG-004</i>              | % Leukocytes CD36+ | -0,75 | 0,0307   |
| <i>Anaerovoracaceae Family XIII UCG-001</i> | % Leukocytes CD36+ | -0,73 | 0,0418   |
| <i>Negativibacillus</i>                     | MFI Leukocytes ROS | -0,8  | 0,017    |
| <i>Ligilactobacillus</i>                    | MFI Leukocytes ROS | -0,85 | 0,0071   |
| <i>Anaeroplasm</i>                          | MFI Leukocytes ROS | 0,77  | 0,0245   |
| <i>Alistipes</i>                            | MFI Leukocytes ROS | 0,82  | 0,0131   |
| <i>Lactobacillus</i>                        | MFI Leukocytes ROS | -0,84 | 0,0094   |
| <i>Lachnospiraceae GCA-900066575</i>        | MFI Leukocytes ROS | 0,82  | 0,0118   |
| <i>Lactobacillaceae HT002</i>               | MFI Leukocytes ROS | -0,79 | 0,0207   |
| <i>Eubacterium nodatum group</i>            | MFI Leukocytes ROS | -0,81 | 0,0158   |
| <i>Lachnospiraceae FCS020 group</i>         | MFI Leukocytes ROS | 0,74  | 0,0366   |
| <i>Bilophila</i>                            | MFI Leukocytes ROS | 0,77  | 0,0245   |
| <i>Oscillospiraceae NK4A214 group</i>       | MFI Leukocytes ROS | -0,71 | 0,0484   |
| <i>Anaerovorax</i>                          | MFI Leukocytes ROS | -0,74 | 0,0356   |
| <i>Peptococcus</i>                          | MFI Leukocytes ROS | -0,91 | 0,0015   |
| <i>Christensenellaceae R-7 group</i>        | MFI Leukocytes ROS | -0,77 | 0,0241   |
| <i>Anaerostipes</i>                         | MFI Leukocytes ROS | -0,73 | 0,0412   |

---

*Lachnospiraceae* UCG-004

MFI Leukocytes ROS

-0,84 0,0086

**Supplementary Table S6:** Correlation between body weight, blood metabolic parameters and immune cells present in VAT with bacterial genera of gut microbiota showing significant correlation. Correlation significant established using the Pearson test (Significant p-value<0.05 was consider).

Abbreviations: CD: cluster of differentiation, VAT: visceral adipose tissue, HDL-c: high-density lipoprotein cholesterol, LDL-c: low-density lipoprotein cholesterol, AST: aspartate aminotransferase, ALT: alanine aminotransferase, ROS: reactive oxygen species, MFI: median fluorescence intensity.
